# Supplementary material
Source: HighWire-hosted journal article supplement (doi:10.1101/rna.068056.118)
Supplement: Supplemental_Table_S1.xlsx [file Supplemental_Table_S1.xlsx]

## Sheet: ProteinXL_3_finish
Score	m/z	Charge	Peptide(1)	Protein(1)	From(1)	To(1)	Peptide(2)	Protein(2)	From(2)	To(2)	Residue(1)	Site(1)	Residue(2)	Site(2)	Resultfile
146	407.73	+4	[AGKIR]	hPcf11	518	522	[EDRNAKR]	hPcf11	540	546	K	520	K	545	CF2_A_HCD25
125	421.84	+5	[ELTLASKR]	hPcf11	655	662	[APKQQQHR]	hPcf11	636	643	K	661	K	638	CF2_A_HCD25
99	423.042	+5	[AGKIR]	hPcf11	518	522	[STKQDIRDPRR]	hPcf11	547	557	K	520	K	549	CF2_A_HCD25
98	580.884	+5	[APKQQQHR]	hPcf11	636	643	[YEDSDKPFVDSPASR]	hPcf11	718	732	K	638	S	721	CF2_A_HCD25
92	725.855	+4	[APKQQQHR]	hPcf11	636	643	[YEDSDKPFVDSPASR]	hPcf11	718	732	K	638	K	723	CF2_A_HCD25
90	824.904	+4	[MIFEGPNKLSPR]	hPcf11	768	779	[YEDSDKPFVDSPASR]	hPcf11	718	732	K	775	K	723	CF2_A_HCD25
84	613.809	+4	[AGKIR]	hPcf11	518	522	[YEDSDKPFVDSPASR]	hPcf11	718	732	K	520	K	723	CF2_A_HCD25
82	470.424	+6	[APKQQQHR]	hPcf11	636	643	[SPFNDRFPLKRPR]	hPcf11	705	717	K	638	K	714	CF2_A_HCD25
79	500.922	+3	[SKDFR]	hClp1	289	293	[FMDLK}	hClp1	421	426	K	290	K	425	CF2_A_HCD25
65	612.322	+4	[FEGSPGLR]	hPcf11	848	855	[MIFEGPNKLSPR]	hPcf11	768	779	S	851	K	775	CF2_A_HCD25
154	418.23	+4	[KVTHR]	hPcf11	1378	1382	[TEKDVSR]	hPcf11	1371	1377	K	1378	K	1373	CF2_A_HCD25_dead
148	407.73	+4	[AGKIR]	hPcf11	518	522	[EDRNAKR]	hPcf11	540	546	K	520	K	545	CF2_A_HCD25_dead
130	557.305	+3	[KVTHR]	hPcf11	1378	1382	[TEKDVSR]	hPcf11	1371	1377	K	1378	K	1373	CF2_A_HCD25_dead
125	366.005	+5	[KVTHRR]	hPcf11	1378	1383	[TEKDVSR]	hPcf11	1371	1377	K	1378	K	1373	CF2_A_HCD25_dead
124	334.785	+5	[KVTHR]	hPcf11	1378	1382	[TEKDVSR]	hPcf11	1371	1377	K	1378	K	1373	CF2_A_HCD25_dead
121	421.84	+5	[ELTLASKR]	hPcf11	655	662	[APKQQQHR]	hPcf11	636	643	K	661	K	638	CF2_A_HCD25_dead
112	448.909	+3	[LNSSKQEKSK]	hPcf11	338	347		Intrapeptidal			K	342	K	345	CF2_A_HCD25_dead
112	700.345	+3	[LSHTKDLKNQESESMR]	hPcf11	378	393		Intrapeptidal			K	382	K	385	CF2_A_HCD25_dead
111	695.027	+3	[DGPTKMIFEGPNKLSPR]	hPcf11	763	779		Intrapeptidal			K	767	K	775	CF2_A_HCD25_dead
110	672.361	+3	[SGEKITKKELDQLDSK]	hPcf11	348	363		Intrapeptidal			K	351	K	355	CF2_A_HCD25_dead
110	700.359	+3	[DGPTKmIFEGPNKLSPR]	hPcf11	763	779		Intrapeptidal			K	767	K	775	CF2_A_HCD25_dead
107	700.358	+3	[DGPTKmIFEGPNKLSPR]	hPcf11	763	779		Intrapeptidal			K	767	K	775	CF2_A_HCD25_dead
106	457.26	+4	[KVTHRR]	hPcf11	1378	1383	[TEKDVSR]	hPcf11	1371	1377	K	1378	K	1373	CF2_A_HCD25_dead
101	414.426	+5	[KVTHR]	hPcf11	1378	1382	[QNRTEKDVSR]	hPcf11	1368	1377	K	1378	K	1373	CF2_A_HCD25_dead
98	488.928	+6	[APKQQQHR]	hPcf11	636	643	[HRESWSSTKGILSPR]	hPcf11	621	635	K	638	K	629	CF2_A_HCD25_dead
97	423.042	+5	[AGKIR]	hPcf11	518	522	[STKQDIRDPRR]	hPcf11	547	557	K	520	K	549	CF2_A_HCD25_dead
96	700.359	+3	[DGPTKmIFEGPNKLSPR]	hPcf11	763	779		Intrapeptidal			K	767	K	775	CF2_A_HCD25_dead
95	580.884	+5	[APKQQQHR]	hPcf11	636	643	[YEDSDKPFVDSPASR]	hPcf11	718	732	K	638	K	723	CF2_A_HCD25_dead
91	527.88	+5	[APKQQQHR]	hPcf11	636	643	[ESWSSTKGILSPR]	hPcf11	623	635	K	638	K	629	CF2_A_HCD25_dead
91	532.071	+5	[AGKIR]	hPcf11	518	522	[QSGAKQSHMEEFTPPSR]	hPcf11	523	539	K	520	K	527	CF2_A_HCD25_dead
90	828.439	+3	[NKIINGIVQKQDTITEESEK]	hPcf11	447	466		Intrapeptidal			K	448	K	456	CF2_A_HCD25_dead
89	725.855	+4	[APKQQQHR]	hPcf11	636	643	[YEDSDKPFVDSPASR]	hPcf11	718	732	K	638	K	723	CF2_A_HCD25_dead
86	510.256	+6	[AGKIR]	hPcf11	518	522	[QSGAKQSHMEEFTPPSREDR]	hPcf11	523	542	K	520	K	527	CF2_A_HCD25_dead
81	613.809	+4	[AGKIR]	hPcf11	518	522	[YEDSDKPFVDSPASR]	hPcf11	718	732	K	520	K	723	CF2_A_HCD25_dead
78	588.643	+3	[SKSGEK]	hPcf11	346	351	[LNSSKQEK]	hPcf11	338	345	K	347	K	342	CF2_A_HCD25_dead
58	472.471	+5	[SKDFRR]	hClp1	289	294	[TVLLPKSGGVVER]	hClp1	276	288	K	290	K	281	CF2_A_HCD25_dead
48	346.464	+4	[AGKIR]	hPcf11	518	522	[RSPKR]	hPcf11	501	505	K	520	K	504	CF2_A_HCD25_dead
156	457.757	+4	[KVTHR]	hPcf11	1378	1382	[APKQQQHR]	hPcf11	636	643	K	1378	K	638	CF2_A_HCD30
156	506.268	+4	[TEKDVSR]	hPcf11	1371	1377	[APKQQQHR]	hPcf11	636	643	K	1373	K	638	CF2_A_HCD30
149	527.045	+4	[ELTLASKR]	hPcf11	655	662	[APKQQQHR]	hPcf11	636	643	K	661	K	638	CF2_A_HCD30
149	607.332	+3	[KVTHR]	hPcf11	1378	1382	[AKSQFFEK]	hPcf11	1404	1411	K	1378	K	1405	CF2_A_HCD30
148	672.013	+3	[TEKDVSR]	hPcf11	1371	1377	[AKSQFFEK]	hPcf11	1404	1411	K	1373	K	1405	CF2_A_HCD30
148	784.789	+3	[QQLLAKQK]	hPcf11	206	213	[KLELELEQAK]	hPcf11	222	231	K	211	K	222	CF2_A_HCD30
146	414.969	+4	[FMDLK}	hClp1	421	426	[SKDFRR]	hClp1	289	294	K	425	K	290	CF2_A_HCD30
146	702.391	+3	[ELTLASKR]	hPcf11	655	662	[APKQQQHR]	hPcf11	636	643	K	661	K	638	CF2_A_HCD30
143	421.838	+5	[ELTLASKR]	hPcf11	655	662	[APKQQQHR]	hPcf11	636	643	K	661	K	638	CF2_A_HCD30
141	500.922	+3	[SKDFR]	hClp1	289	293	[FMDLK}	hClp1	421	426	K	290	K	425	CF2_A_HCD30
134	455.751	+4	[KVTHR]	hPcf11	1378	1382	[AKSQFFEK]	hPcf11	1404	1411	K	1378	K	1405	CF2_A_HCD30
134	674.688	+3	[TEKDVSR]	hPcf11	1371	1377	[APKQQQHR]	hPcf11	636	643	K	1373	K	638	CF2_A_HCD30
133	610.008	+3	[KVTHR]	hPcf11	1378	1382	[APKQQQHR]	hPcf11	636	643	K	1378	K	638	CF2_A_HCD30
133	764.413	+3	[APKQQQHR]	hPcf11	636	643	[ELLQKTSER]	hPcf11	663	671	K	638	T	668	CF2_A_HCD30
132	504.261	+4	[TEKDVSR]	hPcf11	1371	1377	[AKSQFFEK]	hPcf11	1404	1411	K	1373	K	1405	CF2_A_HCD30
132	588.843	+4	[QQLLAKQK]	hPcf11	206	213	[KLELELEQAK]	hPcf11	222	231	K	211	K	222	CF2_A_HCD30
130	724.716	+3	[AKSQFFEK]	hPcf11	1404	1411	[APKQQQHR]	hPcf11	636	643	K	1405	K	638	CF2_A_HCD30
128	942.47	+3	[ELTLASKR]	hPcf11	655	662	[YEDSDKPFVDSPASR]	hPcf11	718	732	K	661	K	723	CF2_A_HCD30
124	639.046	+3	[TEKDVSR]	hPcf11	1371	1377	[LLKTGILK]	hPcf11	1276	1283	K	1373	K	1278	CF2_A_HCD30
118	487.518	+4	[TEKDVSR]	hPcf11	1371	1377	[ELTLASKR]	hPcf11	655	662	K	1373	K	661	CF2_A_HCD30
116	653.349	+4	[TEKDVSR]	hPcf11	1371	1377	[VHEEVVLKTQEAAK]	hPcf11	1412	1425	K	1373	K	1419	CF2_A_HCD30
113	967.47	+3	[APKQQQHR]	hPcf11	636	643	[YEDSDKPFVDSPASR]	hPcf11	718	732	K	638	S	721	CF2_A_HCD30
112	640.85	+4	[ELTLASKR]	hPcf11	655	662	[ESWSSTKGILSPR]	hPcf11	623	635	K	661	S	633	CF2_A_HCD30
111	366.407	+5	[KVTHR]	hPcf11	1378	1382	[APKQQQHR]	hPcf11	636	643	K	1378	K	638	CF2_A_HCD30
110	573.562	+4	[APKQQQHR]	hPcf11	636	643	[ELLQKTSER]	hPcf11	663	671	K	638	T	668	CF2_A_HCD30
110	649.69	+3	[TEKDVSR]	hPcf11	1371	1377	[ELTLASKR]	hPcf11	655	662	S	1376	K	661	CF2_A_HCD30
109	699.123	+4	[LLKTGILK]	hPcf11	1276	1283	[YEDSDKPFVDSPASR]	hPcf11	718	732	K	1278	K	723	CF2_A_HCD30
108	639.35	+4	[KVTHR]	hPcf11	1378	1382	[SQFFEKVHEEVVLK]	hPcf11	1406	1419	K	1378	K	1411	CF2_A_HCD30
107	433.748	+4	[AGKIR]	hPcf11	518	522	[APKQQQHR]	hPcf11	636	643	K	520	K	638	CF2_A_HCD30
107	487.517	+4	[TEKDVSR]	hPcf11	1371	1377	[ELTLASKR]	hPcf11	655	662	K	1373	K	661	CF2_A_HCD30
106	686.328	+4	[TEKDVSR]	hPcf11	1371	1377	[YEDSDKPFVDSPASR]	hPcf11	718	732	K	1373	K	723	CF2_A_HCD30
106	740.392	+4	[APKQQQHR]	hPcf11	636	643	[SLQQVDEHSKPPHLR]	hPcf11	606	620	K	638	K	615	CF2_A_HCD30
104	364.802	+5	[KVTHR]	hPcf11	1378	1382	[AKSQFFEK]	hPcf11	1404	1411	K	1378	K	1405	CF2_A_HCD30
103	692.876	+4	[APKQQQHR]	hPcf11	636	643	[VHEEVVLKTQEAAK]	hPcf11	1412	1425	K	638	K	1419	CF2_A_HCD30
102	580.885	+5	[APKQQQHR]	hPcf11	636	643	[YEDSDKPFVDSPASR]	hPcf11	718	732	K	638	K	723	CF2_A_HCD30
102	725.855	+4	[APKQQQHR]	hPcf11	636	643	[YEDSDKPFVDSPASR]	hPcf11	718	732	K	638	K	723	CF2_A_HCD30
101	489.525	+4	[AGKIR]	hPcf11	518	522	[STKQDIRDPR]	hPcf11	547	556	K	520	K	549	CF2_A_HCD30
101	571.511	+5	[ELTLASKR]	hPcf11	655	662	[HRESWSSTKGILSPR]	hPcf11	621	635	K	661	S	624	CF2_A_HCD30
101	931.828	+3	[LLKTGILK]	hPcf11	1276	1283	[YEDSDKPFVDSPASR]	hPcf11	718	732	K	1278	K	723	CF2_A_HCD30
99	470.425	+6	[APKQQQHR]	hPcf11	636	643	[SPFNDRFPLKRPR]	hPcf11	705	717	K	638	K	714	CF2_A_HCD30
99	564.309	+5	[APKQQQHR]	hPcf11	636	643	[SPFNDRFPLKRPR]	hPcf11	705	717	K	638	K	714	CF2_A_HCD30
98	435.233	+5	[AKSQFFEK]	hPcf11	1404	1411	[APKQQQHR]	hPcf11	636	643	K	1405	K	638	CF2_A_HCD30
98	723.848	+4	[AKSQFFEK]	hPcf11	1404	1411	[YEDSDKPFVDSPASR]	hPcf11	718	732	K	1405	K	723	CF2_A_HCD30
97	592.51	+5	[APKQQQHR]	hPcf11	636	643	[SLQQVDEHSKPPHLR]	hPcf11	606	620	K	638	K	615	CF2_A_HCD30
94	405.215	+5	[TEKDVSR]	hPcf11	1371	1377	[APKQQQHR]	hPcf11	636	643	K	1373	K	638	CF2_A_HCD30
94	459.051	+5	[APKQQQHR]	hPcf11	636	643	[ELLQKTSER]	hPcf11	663	671	K	638	T	668	CF2_A_HCD30
94	582.112	+5	[APKQQQHR]	hPcf11	636	643	[SQFFEKVHEEVVLK]	hPcf11	1406	1419	K	638	K	1411	CF2_A_HCD30
93	430.002	+4	[RSPKR]	hPcf11	501	505	[SPIIHSPK]	hPcf11	489	496	K	504	S	494	CF2_A_HCD30
93	753.621	+4	[ELLQKTSER]	hPcf11	663	671	[YEDSDKPFVDSPASR]	hPcf11	718	732	K	667	K	723	CF2_A_HCD30
91	1114.53	+3	[DGPTKMIFEGPNK]	hPcf11	763	775	[YEDSDKPFVDSPASR]	hPcf11	718	732	K	767	K	723	CF2_A_HCD30
88	451.234	+4	[TAEKK]	hPcf11	425	429	[KDKDEHMK]	hPcf11	429	436	K	428	K	429	CF2_A_HCD30
87	455.751	+4	[KVTHR]	hPcf11	1378	1382	[KFTFDAGAK]	hClp1	54	62	K	1378	K	54	CF2_A_HCD30
87	644.844	+4	[APKQQQHR]	hPcf11	636	643	[MIFEGPNKLSPR]	hPcf11	768	779	K	638	S	777	CF2_A_HCD30
86	493.929	+6	[APKQQQHR]	hPcf11	636	643	[SLQQVDEHSKPPHLR]	hPcf11	606	620	K	638	K	615	CF2_A_HCD30
83	914.767	+3	[TEKDVSR]	hPcf11	1371	1377	[YEDSDKPFVDSPASR]	hPcf11	718	732	K	1373	K	723	CF2_A_HCD30
82	658.674	+6	[ISQHSHGKDQSHR]	hPcf11	302	314	[SRPGPSLQIQDLKGTNRDPR]	hPcf11	279	298	K	309	T	293	CF2_A_HCD30
82	736.561	+5	[YEDSDKPFVDSPASR]	hPcf11	718	732	[SLQQVDEHSKPPHLR]	hPcf11	606	620	K	723	K	615	CF2_A_HCD30
81	552.956	+3	[FMDLK}	hClp1	421	426	[SKDFRR]	hClp1	289	294	K	425	K	290	CF2_A_HCD30
80	629.356	+4	[LLKTGILK]	hPcf11	1276	1283	[DGPTKMIFEGPNK]	hPcf11	763	775	K	1278	K	767	CF2_A_HCD30
80	840.146	+4	[DGPTKmIFEGPNK]	hPcf11	763	775	[YEDSDKPFVDSPASR]	hPcf11	718	732	K	767	K	723	CF2_A_HCD30
78	586.522	+5	[ELLQKTSER]	hPcf11	663	671	[SPFNDRFPLKRPR]	hPcf11	705	717	K	667	K	714	CF2_A_HCD30
74	601.309	+3	[TAEKK]	hPcf11	425	429	[KDKDEHMK]	hPcf11	429	436	K	428	K	431	CF2_A_HCD30
74	620.072	+4	[TEKDVSR]	hPcf11	1371	1377	[ESWSSTKGILSPR]	hPcf11	623	635	K	1373	S	633	CF2_A_HCD30
74	635.997	+3	[SKSGEK]	hPcf11	346	351	[KELDQLDSK]	hPcf11	355	363	S	348	K	355	CF2_A_HCD30
73	555.443	+6	[STKQDIRDPR]	hPcf11	547	556	[QSGAKQSHMEEFTPPSR]	hPcf11	523	539	K	549	S	524	CF2_A_HCD30
71	606.641	+3	[TAEKK]	hPcf11	425	429	[KDKDEHmK]	hPcf11	429	436	K	428	K	431	CF2_A_HCD30
161	557.305	+3	[KVTHR]	hPcf11	1378	1382	[TEKDVSR]	hPcf11	1371	1377	K	1378	K	1373	CF2_A_HCD30_dead
156	506.268	+4	[TEKDVSR]	hPcf11	1371	1377	[APKQQQHR]	hPcf11	636	643	K	1373	K	638	CF2_A_HCD30_dead
156	526.29	+3	[QEKSK]	hPcf11	343	347	[SGEKITK]	hPcf11	348	354	K	345	K	351	CF2_A_HCD30_dead
152	457.757	+4	[KVTHR]	hPcf11	1378	1382	[APKQQQHR]	hPcf11	636	643	K	1378	K	638	CF2_A_HCD30_dead
151	527.045	+4	[ELTLASKR]	hPcf11	655	662	[APKQQQHR]	hPcf11	636	643	K	661	K	638	CF2_A_HCD30_dead
149	784.789	+3	[QQLLAKQK]	hPcf11	206	213	[KLELELEQAK]	hPcf11	222	231	K	211	K	222	CF2_A_HCD30_dead
148	678.36	+3	[SGEKITK]	hPcf11	348	354	[KELDQLDSK]	hPcf11	355	363	K	351	K	355	CF2_A_HCD30_dead
147	418.231	+4	[KVTHR]	hPcf11	1378	1382	[TEKDVSR]	hPcf11	1371	1377	K	1378	K	1373	CF2_A_HCD30_dead
144	607.332	+3	[KVTHR]	hPcf11	1378	1382	[AKSQFFEK]	hPcf11	1404	1411	K	1378	K	1405	CF2_A_HCD30_dead
144	702.391	+3	[ELTLASKR]	hPcf11	655	662	[APKQQQHR]	hPcf11	636	643	K	661	K	638	CF2_A_HCD30_dead
143	672.013	+3	[TEKDVSR]	hPcf11	1371	1377	[AKSQFFEK]	hPcf11	1404	1411	K	1373	K	1405	CF2_A_HCD30_dead
142	421.838	+5	[ELTLASKR]	hPcf11	655	662	[APKQQQHR]	hPcf11	636	643	K	661	K	638	CF2_A_HCD30_dead
142	500.922	+3	[SKDFR]	hClp1	289	293	[FMDLK}	hClp1	421	426	K	290	K	425	CF2_A_HCD30_dead
141	363.225	+3	[KSLFKLR]	hPcf11	113	119		Intrapeptidal			K	113	K	117	CF2_A_HCD30_dead
140	414.969	+4	[FMDLK}	hClp1	421	426	[SKDFRR]	hClp1	289	294	K	425	K	290	CF2_A_HCD30_dead
138	606.641	+3	[KTAEK]	hPcf11	424	428	[KDKDEHmK]	hPcf11	429	436	K	424	K	431	CF2_A_HCD30_dead
138	739.414	+3	[ELTLASKR]	hPcf11	655	662	[ELLQKTSER]	hPcf11	663	671	K	661	K	667	CF2_A_HCD30_dead
136	517.781	+4	[KVTHR]	hPcf11	1378	1382	[QNRTEKDVSR]	hPcf11	1368	1377	K	1378	K	1373	CF2_A_HCD30_dead
136	588.843	+4	[QQLLAKQK]	hPcf11	206	213	[KLELELEQAK]	hPcf11	222	231	K	211	K	222	CF2_A_HCD30_dead
135	496.263	+3	[KELDQLDSKSK]	hPcf11	355	365		Intrapeptidal			K	355	K	363	CF2_A_HCD30_dead
135	672.013	+3	[TEKDVSR]	hPcf11	1371	1377	[KFTFDAGAK]	hClp1	54	62	K	1373	K	54	CF2_A_HCD30_dead
134	601.309	+3	[KTAEK]	hPcf11	424	428	[KDKDEHMK]	hPcf11	429	436	K	424	K	431	CF2_A_HCD30_dead
134	608.289	+3	[KDKDEHMKSSEHR]	hPcf11	429	441		Intrapeptidal			K	429	K	436	CF2_A_HCD30_dead
132	455.751	+4	[KVTHR]	hPcf11	1378	1382	[AKSQFFEK]	hPcf11	1404	1411	K	1378	K	1405	CF2_A_HCD30_dead
132	504.261	+4	[TEKDVSR]	hPcf11	1371	1377	[AKSQFFEK]	hPcf11	1404	1411	K	1373	K	1405	CF2_A_HCD30_dead
130	504.262	+4	[TEKDVSR]	hPcf11	1371	1377	[KFTFDAGAK]	hClp1	54	62	K	1373	K	54	CF2_A_HCD30_dead
130	674.688	+3	[TEKDVSR]	hPcf11	1371	1377	[APKQQQHR]	hPcf11	636	643	K	1373	K	638	CF2_A_HCD30_dead
130	764.413	+3	[APKQQQHR]	hPcf11	636	643	[ELLQKTSER]	hPcf11	663	671	K	638	K	667	CF2_A_HCD30_dead
128	942.47	+3	[ELTLASKR]	hPcf11	655	662	[YEDSDKPFVDSPASR]	hPcf11	718	732	K	661	K	723	CF2_A_HCD30_dead
128	457.255	+4	[KVTHRR]	hPcf11	1378	1383	[TEKDVSR]	hPcf11	1371	1377	K	1378	K	1373	CF2_A_HCD30_dead
128	610.008	+3	[KVTHR]	hPcf11	1378	1382	[APKQQQHR]	hPcf11	636	643	K	1378	K	638	CF2_A_HCD30_dead
128	700.346	+3	[LSHTKDLKNQESESMR]	hPcf11	378	393		Intrapeptidal			K	382	K	385	CF2_A_HCD30_dead
127	879.13	+3	[APKQQQHR]	hPcf11	636	643	[ESWSSTKGILSPR]	hPcf11	623	635	K	638	K	629	CF2_A_HCD30_dead
127	590.548	+4	[NKLSHTK]	hPcf11	376	382	[DLKNQESESMR]	hPcf11	383	393	K	377	K	385	CF2_A_HCD30_dead
126	586.513	+5	[APKQQQHR]	hPcf11	636	643	[HRESWSSTKGILSPR]	hPcf11	621	635	K	638	K	629	CF2_A_HCD30_dead
125	724.716	+3	[AKSQFFEK]	hPcf11	1404	1411	[APKQQQHR]	hPcf11	636	643	K	1405	K	638	CF2_A_HCD30_dead
124	334.786	+5	[KVTHR]	hPcf11	1378	1382	[TEKDVSR]	hPcf11	1371	1377	K	1378	K	1373	CF2_A_HCD30_dead
123	414.426	+5	[KVTHR]	hPcf11	1378	1382	[QNRTEKDVSR]	hPcf11	1368	1377	K	1378	K	1373	CF2_A_HCD30_dead
121	418.97	+4	[FmDLK}	hClp1	421	426	[SKDFRR]	hClp1	289	294	K	425	K	290	CF2_A_HCD30_dead
120	639.046	+3	[TEKDVSR]	hPcf11	1371	1377	[LLKTGILK]	hPcf11	1276	1283	K	1373	K	1278	CF2_A_HCD30_dead
120	767.068	+3	[EDRNAKR]	hPcf11	540	546	[STKQDIRDPR]	hPcf11	547	556	K	545	K	549	CF2_A_HCD30_dead
119	451.234	+4	[KTAEK]	hPcf11	424	428	[KDKDEHMK]	hPcf11	429	436	K	424	K	431	CF2_A_HCD30_dead
118	649.69	+3	[TEKDVSR]	hPcf11	1371	1377	[ELTLASKR]	hPcf11	655	662	K	1373	K	661	CF2_A_HCD30_dead
115	487.518	+4	[TEKDVSR]	hPcf11	1371	1377	[ELTLASKR]	hPcf11	655	662	K	1373	K	661	CF2_A_HCD30_dead
115	793.117	+3	[QLLELQQKKLELELEQAK]	hPcf11	214	231		Intrapeptidal			K	221	K	222	CF2_A_HCD30_dead
115	967.47	+3	[APKQQQHR]	hPcf11	636	643	[YEDSDKPFVDSPASR]	hPcf11	718	732	K	638	K	723	CF2_A_HCD30_dead
113	472.471	+5	[SKDFRR]	hClp1	289	294	[TVLLPKSGGVVER]	hClp1	276	288	K	290	K	281	CF2_A_HCD30_dead
113	653.349	+4	[TEKDVSR]	hPcf11	1371	1377	[VHEEVVLKTQEAAK]	hPcf11	1412	1425	K	1373	K	1419	CF2_A_HCD30_dead
111	407.73	+4	[AGKIR]	hPcf11	518	522	[EDRNAKR]	hPcf11	540	546	K	520	K	545	CF2_A_HCD30_dead
110	570.922	+3	[DKDEHmKSSEHR]	hPcf11	430	441		Intrapeptidal			K	431	K	436	CF2_A_HCD30_dead
109	551.312	+4	[SKDFR]	hClp1	289	293	[TVLLPKSGGVVER]	hClp1	276	288	K	290	K	281	CF2_A_HCD30_dead
109	573.562	+4	[APKQQQHR]	hPcf11	636	643	[ELLQKTSER]	hPcf11	663	671	K	638	K	667	CF2_A_HCD30_dead
108	640.85	+4	[ELTLASKR]	hPcf11	655	662	[ESWSSTKGILSPR]	hPcf11	623	635	K	661	K	629	CF2_A_HCD30_dead
107	487.517	+4	[TEKDVSR]	hPcf11	1371	1377	[ELTLASKR]	hPcf11	655	662	K	1373	K	661	CF2_A_HCD30_dead
106	366.407	+5	[KVTHR]	hPcf11	1378	1382	[APKQQQHR]	hPcf11	636	643	K	1378	K	638	CF2_A_HCD30_dead
106	554.812	+4	[ELTLASKR]	hPcf11	655	662	[ELLQKTSER]	hPcf11	663	671	K	661	K	667	CF2_A_HCD30_dead
106	639.35	+4	[KVTHR]	hPcf11	1378	1382	[SQFFEKVHEEVVLK]	hPcf11	1406	1419	K	1378	K	1411	CF2_A_HCD30_dead
106	699.123	+4	[LLKTGILK]	hPcf11	1276	1283	[YEDSDKPFVDSPASR]	hPcf11	718	732	K	1278	K	723	CF2_A_HCD30_dead
105	700.359	+3	[DGPTKmIFEGPNKLSPR]	hPcf11	763	779		Intrapeptidal			K	767	K	775	CF2_A_HCD30_dead
105	783.144	+4	[WKSGWEENK]	hPcf11	597	605	[SLQQVDEHSKPPHLR]	hPcf11	606	620	K	598	K	615	CF2_A_HCD30_dead
104	686.328	+4	[TEKDVSR]	hPcf11	1371	1377	[YEDSDKPFVDSPASR]	hPcf11	718	732	K	1373	K	723	CF2_A_HCD30_dead
103	364.802	+5	[KVTHR]	hPcf11	1378	1382	[AKSQFFEK]	hPcf11	1404	1411	K	1378	K	1405	CF2_A_HCD30_dead
103	391.822	+5	[AGKIR]	hPcf11	518	522	[STKQDIRDPR]	hPcf11	547	556	K	520	K	549	CF2_A_HCD30_dead
103	433.748	+4	[AGKIR]	hPcf11	518	522	[APKQQQHR]	hPcf11	636	643	K	520	K	638	CF2_A_HCD30_dead
103	568.988	+3	[QEKSK]	hPcf11	343	347	[SGEKITKK]	hPcf11	348	355	K	345	K	351	CF2_A_HCD30_dead
103	676.935	+5	[ISQHSHGKDQSHR]	hPcf11	302	314	[KEFLMNTLNQSDTK]	hPcf11	315	328	K	309	K	315	CF2_A_HCD30_dead
103	845.916	+4	[ISQHSHGKDQSHR]	hPcf11	302	314	[KEFLMNTLNQSDTK]	hPcf11	315	328	K	309	K	315	CF2_A_HCD30_dead
102	361.188	+5	[KTAEK]	hPcf11	424	428	[KDKDEHMK]	hPcf11	429	436	K	424	K	431	CF2_A_HCD30_dead
102	527.88	+5	[APKQQQHR]	hPcf11	636	643	[ESWSSTKGILSPR]	hPcf11	623	635	K	638	K	629	CF2_A_HCD30_dead
102	659.599	+4	[APKQQQHR]	hPcf11	636	643	[ESWSSTKGILSPR]	hPcf11	623	635	K	638	K	629	CF2_A_HCD30_dead
102	740.392	+4	[APKQQQHR]	hPcf11	636	643	[SLQQVDEHSKPPHLR]	hPcf11	606	620	K	638	K	615	CF2_A_HCD30_dead
101	612.11	+5	[AGKIR]	hPcf11	518	522	[QSGAKQSHMEEFTPPSREDR]	hPcf11	523	542	K	520	K	527	CF2_A_HCD30_dead
100	580.885	+5	[APKQQQHR]	hPcf11	636	643	[YEDSDKPFVDSPASR]	hPcf11	718	732	K	638	K	723	CF2_A_HCD30_dead
100	828.439	+3	[NKIINGIVQKQDTITEESEK]	hPcf11	447	466		Intrapeptidal			K	448	K	456	CF2_A_HCD30_dead
99	692.876	+4	[APKQQQHR]	hPcf11	636	643	[VHEEVVLKTQEAAK]	hPcf11	1412	1425	K	638	K	1419	CF2_A_HCD30_dead
99	725.855	+4	[APKQQQHR]	hPcf11	636	643	[YEDSDKPFVDSPASR]	hPcf11	718	732	K	638	K	723	CF2_A_HCD30_dead
98	426.993	+4	[QEKSK]	hPcf11	343	347	[SGEKITKK]	hPcf11	348	355	K	345	K	351	CF2_A_HCD30_dead
98	488.928	+6	[APKQQQHR]	hPcf11	636	643	[HRESWSSTKGILSPR]	hPcf11	621	635	K	638	K	629	CF2_A_HCD30_dead
98	931.828	+3	[LLKTGILK]	hPcf11	1276	1283	[YEDSDKPFVDSPASR]	hPcf11	718	732	K	1278	K	723	CF2_A_HCD30_dead
96	590.465	+6	[SPFNDRFPLKRPR]	hPcf11	705	717	[YEDSDKPFVDSPASR]	hPcf11	718	732	K	714	K	723	CF2_A_HCD30_dead
96	441.73	+4	[SKSGEK]	hPcf11	346	351	[LNSSKQEK]	hPcf11	338	345	K	347	K	342	CF2_A_HCD30_dead
96	435.233	+5	[AKSQFFEK]	hPcf11	1404	1411	[APKQQQHR]	hPcf11	636	643	K	1405	K	638	CF2_A_HCD30_dead
96	489.525	+4	[AGKIR]	hPcf11	518	522	[STKQDIRDPR]	hPcf11	547	556	K	520	K	549	CF2_A_HCD30_dead
96	505.275	+4	[QEKSK]	hPcf11	343	347	[TIPSEKLNSSK]	hPcf11	332	342	K	345	K	337	CF2_A_HCD30_dead
95	680.133	+5	[ISQHSHGKDQSHR]	hPcf11	302	314	[KEFLmNTLNQSDTK]	hPcf11	315	328	K	309	K	315	CF2_A_HCD30_dead
95	723.848	+4	[AKSQFFEK]	hPcf11	1404	1411	[YEDSDKPFVDSPASR]	hPcf11	718	732	K	1405	K	723	CF2_A_HCD30_dead
94	592.51	+5	[APKQQQHR]	hPcf11	636	643	[SLQQVDEHSKPPHLR]	hPcf11	606	620	K	638	K	615	CF2_A_HCD30_dead
94	459.051	+5	[APKQQQHR]	hPcf11	636	643	[ELLQKTSER]	hPcf11	663	671	K	638	K	667	CF2_A_HCD30_dead
93	535.27	+5	[AGKIR]	hPcf11	518	522	[QSGAKQSHmEEFTPPSR]	hPcf11	523	539	K	520	K	527	CF2_A_HCD30_dead
93	626.716	+5	[WKSGWEENK]	hPcf11	597	605	[SLQQVDEHSKPPHLR]	hPcf11	606	620	K	598	K	615	CF2_A_HCD30_dead
93	664.838	+4	[AGKIR]	hPcf11	518	522	[QSGAKQSHMEEFTPPSR]	hPcf11	523	539	K	520	K	527	CF2_A_HCD30_dead
92	405.215	+5	[TEKDVSR]	hPcf11	1371	1377	[APKQQQHR]	hPcf11	636	643	K	1373	K	638	CF2_A_HCD30_dead
92	753.621	+4	[ELLQKTSER]	hPcf11	663	671	[YEDSDKPFVDSPASR]	hPcf11	718	732	K	667	K	723	CF2_A_HCD30_dead
91	582.112	+5	[APKQQQHR]	hPcf11	636	643	[SQFFEKVHEEVVLK]	hPcf11	1406	1419	K	638	K	1411	CF2_A_HCD30_dead
91	734.747	+3	[SKDFR]	hClp1	289	293	[TVLLPKSGGVVER]	hClp1	276	288	K	290	K	281	CF2_A_HCD30_dead
89	510.256	+6	[AGKIR]	hPcf11	518	522	[QSGAKQSHMEEFTPPSREDR]	hPcf11	523	542	K	520	K	527	CF2_A_HCD30_dead
86	736.561	+5	[YEDSDKPFVDSPASR]	hPcf11	718	732	[SLQQVDEHSKPPHLR]	hPcf11	606	620	K	723	K	615	CF2_A_HCD30_dead
77	586.522	+5	[ELLQKTSER]	hPcf11	663	671	[SPFNDRFPLKRPR]	hPcf11	705	717	K	667	K	714	CF2_A_HCD30_dead
152	702.39	+3	[ELTLASKR]	hPcf11	655	662	[APKQQQHR]	hPcf11	636	643	K	661	K	638	CF2_A_HCD35
144	414.969	+4	[FMDLK}	hClp1	421	426	[SKDFRR]	hClp1	289	294	K	425	K	290	CF2_A_HCD35
140	543.304	+3	[AGKIR]	hPcf11	518	522	[EDRNAKR]	hPcf11	540	546	K	520	K	545	CF2_A_HCD35
138	967.47	+3	[APKQQQHR]	hPcf11	636	643	[YEDSDKPFVDSPASR]	hPcf11	718	732	K	638	K	723	CF2_A_HCD35
133	527.045	+4	[ELTLASKR]	hPcf11	655	662	[APKQQQHR]	hPcf11	636	643	K	661	K	638	CF2_A_HCD35
128	705.135	+4	[APKQQQHR]	hPcf11	636	643	[SPFNDRFPLKRPR]	hPcf11	705	717	K	638	K	714	CF2_A_HCD35
121	407.73	+4	[AGKIR]	hPcf11	518	522	[EDRNAKR]	hPcf11	540	546	K	520	K	545	CF2_A_HCD35
119	679.887	+4	[APKQQQHR]	hPcf11	636	643	[ELTLASKRELLQK]	hPcf11	655	667	K	638	K	661	CF2_A_HCD35
116	640.596	+4	[APKQQQHR]	hPcf11	636	643	[RSTKQDIRDPR]	hPcf11	546	556	K	638	K	549	CF2_A_HCD35
111	610.01	+3	[KVTHR]	hPcf11	1378	1382	[APKQQQHR]	hPcf11	636	643	K	1378	K	638	CF2_A_HCD35
109	564.309	+5	[APKQQQHR]	hPcf11	636	643	[SPFNDRFPLKRPR]	hPcf11	705	717	K	638	K	714	CF2_A_HCD35
108	496.782	+4	[KVTHRR]	hPcf11	1378	1383	[APKQQQHR]	hPcf11	636	643	K	1378	K	638	CF2_A_HCD35
102	725.856	+4	[APKQQQHR]	hPcf11	636	643	[YEDSDKPFVDSPASR]	hPcf11	718	732	K	638	K	723	CF2_A_HCD35
101	433.749	+4	[AGKIR]	hPcf11	518	522	[APKQQQHR]	hPcf11	636	643	K	520	K	638	CF2_A_HCD35
97	470.425	+6	[APKQQQHR]	hPcf11	636	643	[SPFNDRFPLKRPR]	hPcf11	705	717	K	638	K	714	CF2_A_HCD35
96	580.885	+5	[APKQQQHR]	hPcf11	636	643	[YEDSDKPFVDSPASR]	hPcf11	718	732	K	638	Y	718	CF2_A_HCD35
94	397.627	+5	[KVTHRR]	hPcf11	1378	1383	[APKQQQHR]	hPcf11	636	643	K	1378	K	638	CF2_A_HCD35
94	824.904	+4	[MIFEGPNKLSPR]	hPcf11	768	779	[YEDSDKPFVDSPASR]	hPcf11	718	732	S	777	K	723	CF2_A_HCD35
93	474.672	+5	[AGKIR]	hPcf11	518	522	[SPFNDRFPLKRPR]	hPcf11	705	717	K	520	K	714	CF2_A_HCD35
91	759.774	+5	[YEDSDKPFVDSPASR]	hPcf11	718	732	[DGPTKMIFEGPNKLSPR]	hPcf11	763	779	K	723	K	767	CF2_A_HCD35
89	662.04	+3	[KVTHRR]	hPcf11	1378	1383	[APKQQQHR]	hPcf11	636	643	K	1378	K	638	CF2_A_HCD35
88	581.459	+6	[STKQDIRDPRR]	hPcf11	547	557	[QSGAKQSHMEEFTPPSR]	hPcf11	523	539	S	547	K	527	CF2_A_HCD35
88	644.844	+4	[APKQQQHR]	hPcf11	636	643	[MIFEGPNKLSPR]	hPcf11	768	779	K	638	S	777	CF2_A_HCD35
82	552.957	+3	[FMDLK}	hClp1	421	426	[SKDFRR]	hClp1	289	294	K	425	K	290	CF2_A_HCD35
81	595.103	+5	[QAEKEEERGPR]	hClp1	106	116	[ESWSSTKGILSPR]	hPcf11	623	635	K	109	K	629	CF2_A_HCD35
80	613.808	+4	[AGKIR]	hPcf11	518	522	[YEDSDKPFVDSPASR]	hPcf11	718	732	K	520	K	723	CF2_A_HCD35
77	612.322	+4	[FEGSPGLR]	hPcf11	848	855	[MIFEGPNKLSPR]	hPcf11	768	779	S	851	K	775	CF2_A_HCD35
163	557.305	+3	[KVTHR]	hPcf11	1378	1382	[TEKDVSR]	hPcf11	1371	1377	K	1378	K	1373	CF2_A_HCD35_dead
148	702.39	+3	[ELTLASKR]	hPcf11	655	662	[APKQQQHR]	hPcf11	636	643	K	661	K	638	CF2_A_HCD35_dead
145	879.13	+3	[APKQQQHR]	hPcf11	636	643	[ESWSSTKGILSPR]	hPcf11	623	635	K	638	K	629	CF2_A_HCD35_dead
144	609.338	+3	[KVTHRR]	hPcf11	1378	1383	[TEKDVSR]	hPcf11	1371	1377	K	1378	K	1373	CF2_A_HCD35_dead
141	543.304	+3	[AGKIR]	hPcf11	518	522	[EDRNAKR]	hPcf11	540	546	K	520	K	545	CF2_A_HCD35_dead
138	418.231	+4	[KVTHR]	hPcf11	1378	1382	[TEKDVSR]	hPcf11	1371	1377	K	1378	K	1373	CF2_A_HCD35_dead
137	414.969	+4	[FMDLK}	hClp1	421	426	[SKDFRR]	hClp1	289	294	K	425	K	290	CF2_A_HCD35_dead
134	967.47	+3	[APKQQQHR]	hPcf11	636	643	[YEDSDKPFVDSPASR]	hPcf11	718	732	K	638	K	723	CF2_A_HCD35_dead
133	363.226	+3	[KSLFKLR]	hPcf11	113	119		Intrapeptidal			K	113	K	117	CF2_A_HCD35_dead
131	517.78	+4	[KVTHR]	hPcf11	1378	1382	[QNRTEKDVSR]	hPcf11	1368	1377	K	1378	K	1373	CF2_A_HCD35_dead
129	732.889	+4	[APKQQQHR]	hPcf11	636	643	[HRESWSSTKGILSPR]	hPcf11	621	635	K	638	K	629	CF2_A_HCD35_dead
128	457.255	+4	[KVTHRR]	hPcf11	1378	1383	[TEKDVSR]	hPcf11	1371	1377	K	1378	K	1373	CF2_A_HCD35_dead
128	527.045	+4	[ELTLASKR]	hPcf11	655	662	[APKQQQHR]	hPcf11	636	643	K	661	K	638	CF2_A_HCD35_dead
126	556.806	+4	[KVTHRR]	hPcf11	1378	1383	[QNRTEKDVSR]	hPcf11	1368	1377	K	1378	K	1373	CF2_A_HCD35_dead
126	786.781	+3	[SKDFRR]	hClp1	289	294	[TVLLPKSGGVVER]	hClp1	276	288	K	290	K	281	CF2_A_HCD35_dead
124	705.135	+4	[APKQQQHR]	hPcf11	636	643	[SPFNDRFPLKRPR]	hPcf11	705	717	K	638	K	714	CF2_A_HCD35_dead
120	586.513	+5	[APKQQQHR]	hPcf11	636	643	[HRESWSSTKGILSPR]	hPcf11	621	635	K	638	K	629	CF2_A_HCD35_dead
119	407.73	+4	[AGKIR]	hPcf11	518	522	[EDRNAKR]	hPcf11	540	546	K	520	K	545	CF2_A_HCD35_dead
117	700.345	+3	[LSHTKDLKNQESESMR]	hPcf11	378	393		Intrapeptidal			K	382	K	385	CF2_A_HCD35_dead
117	595.306	+3	[KTAEKKDKDEHMK]	hPcf11	424	436		Intrapeptidal			K	424	K	428	CF2_A_HCD35_dead
116	679.887	+4	[APKQQQHR]	hPcf11	636	643	[ELTLASKRELLQK]	hPcf11	655	667	K	638	K	661	CF2_A_HCD35_dead
114	690.038	+3	[KVTHR]	hPcf11	1378	1382	[QNRTEKDVSR]	hPcf11	1368	1377	K	1378	K	1373	CF2_A_HCD35_dead
113	366.005	+5	[KVTHRR]	hPcf11	1378	1383	[TEKDVSR]	hPcf11	1371	1377	K	1378	K	1373	CF2_A_HCD35_dead
113	491.864	+5	[EDRNAKR]	hPcf11	540	546	[STKQDIRDPRR]	hPcf11	547	557	K	545	K	549	CF2_A_HCD35_dead
113	588.643	+3	[SKSGEK]	hPcf11	346	351	[LNSSKQEK]	hPcf11	338	345	K	347	K	342	CF2_A_HCD35_dead
113	640.596	+4	[APKQQQHR]	hPcf11	636	643	[RSTKQDIRDPR]	hPcf11	546	556	K	638	K	549	CF2_A_HCD35_dead
112	608.288	+3	[KDKDEHMKSSEHR]	hPcf11	429	441		Intrapeptidal			K	429	K	436	CF2_A_HCD35_dead
111	334.786	+5	[KVTHR]	hPcf11	1378	1382	[TEKDVSR]	hPcf11	1371	1377	K	1378	K	1373	CF2_A_HCD35_dead
109	496.782	+4	[KVTHRR]	hPcf11	1378	1383	[APKQQQHR]	hPcf11	636	643	K	1378	K	638	CF2_A_HCD35_dead
106	610.01	+3	[KVTHR]	hPcf11	1378	1382	[APKQQQHR]	hPcf11	636	643	K	1378	K	638	CF2_A_HCD35_dead
106	414.425	+5	[KVTHR]	hPcf11	1378	1382	[QNRTEKDVSR]	hPcf11	1368	1377	K	1378	K	1373	CF2_A_HCD35_dead
105	564.309	+5	[APKQQQHR]	hPcf11	636	643	[SPFNDRFPLKRPR]	hPcf11	705	717	K	638	K	714	CF2_A_HCD35_dead
105	664.839	+4	[AGKIR]	hPcf11	518	522	[QSGAKQSHMEEFTPPSR]	hPcf11	523	539	K	520	K	527	CF2_A_HCD35_dead
104	527.88	+5	[APKQQQHR]	hPcf11	636	643	[ESWSSTKGILSPR]	hPcf11	623	635	K	638	K	629	CF2_A_HCD35_dead
104	659.599	+4	[APKQQQHR]	hPcf11	636	643	[ESWSSTKGILSPR]	hPcf11	623	635	K	638	K	629	CF2_A_HCD35_dead
103	488.928	+6	[APKQQQHR]	hPcf11	636	643	[HRESWSSTKGILSPR]	hPcf11	621	635	K	638	K	629	CF2_A_HCD35_dead
102	472.471	+5	[SKDFRR]	hClp1	289	294	[TVLLPKSGGVVER]	hClp1	276	288	K	290	K	281	CF2_A_HCD35_dead
102	474.918	+3	[NKKFTFDAGAK]	hClp1	52	62		Intrapeptidal			K	53	K	54	CF2_A_HCD35_dead
102	711.751	+3	[QQLLAKQKQLLELQQK]	hPcf11	206	221		Intrapeptidal			K	211	K	213	CF2_A_HCD35_dead
102	767.068	+3	[EDRNAKR]	hPcf11	540	546	[STKQDIRDPR]	hPcf11	547	556	K	545	K	549	CF2_A_HCD35_dead
100	672.361	+3	[SGEKITKKELDQLDSK]	hPcf11	348	363		Intrapeptidal			K	351	K	355	CF2_A_HCD35_dead
100	725.856	+4	[APKQQQHR]	hPcf11	636	643	[YEDSDKPFVDSPASR]	hPcf11	718	732	K	638	K	723	CF2_A_HCD35_dead
99	433.749	+4	[AGKIR]	hPcf11	518	522	[APKQQQHR]	hPcf11	636	643	K	520	K	638	CF2_A_HCD35_dead
98	580.885	+5	[APKQQQHR]	hPcf11	636	643	[YEDSDKPFVDSPASR]	hPcf11	718	732	K	638	K	723	CF2_A_HCD35_dead
98	590.337	+4	[SKDFRR]	hClp1	289	294	[TVLLPKSGGVVER]	hClp1	276	288	K	290	K	281	CF2_A_HCD35_dead
98	828.44	+3	[NKIINGIVQKQDTITEESEK]	hPcf11	447	466		Intrapeptidal			K	448	K	456	CF2_A_HCD35_dead
97	423.04	+5	[AGKIR]	hPcf11	518	522	[STKQDIRDPRR]	hPcf11	547	557	K	520	K	549	CF2_A_HCD35_dead
96	807.18	+4	[NKIINGIVQK]	hPcf11	447	456	[QDTITEESEKQGTKPGR]	hPcf11	457	473	K	448	K	470	CF2_A_HCD35_dead
96	470.425	+6	[APKQQQHR]	hPcf11	636	643	[SPFNDRFPLKRPR]	hPcf11	705	717	K	638	K	714	CF2_A_HCD35_dead
96	528.551	+4	[AGKIR]	hPcf11	518	522	[STKQDIRDPRR]	hPcf11	547	557	K	520	K	549	CF2_A_HCD35_dead
96	551.313	+4	[SKDFR]	hClp1	289	293	[TVLLPKSGGVVER]	hClp1	276	288	K	290	K	281	CF2_A_HCD35_dead
96	612.106	+5	[AGKIR]	hPcf11	518	522	[QSGAKQSHMEEFTPPSREDR]	hPcf11	523	542	K	520	K	527	CF2_A_HCD35_dead
95	504.262	+4	[TEKDVSR]	hPcf11	1371	1377	[KFTFDAGAK]	hClp1	54	62	K	1373	K	54	CF2_A_HCD35_dead
95	626.717	+5	[WKSGWEENK]	hPcf11	597	605	[SLQQVDEHSKPPHLR]	hPcf11	606	620	K	598	K	615	CF2_A_HCD35_dead
95	764.881	+4	[AGKIR]	hPcf11	518	522	[QSGAKQSHMEEFTPPSREDR]	hPcf11	523	542	K	520	K	527	CF2_A_HCD35_dead
93	572.644	+3	[TSKTIPSEKLNSSK]	hPcf11	329	342		Intrapeptidal			K	331	K	337	CF2_A_HCD35_dead
93	645.948	+5	[NKIINGIVQK]	hPcf11	447	456	[QDTITEESEKQGTKPGR]	hPcf11	457	473	K	448	K	470	CF2_A_HCD35_dead
92	750.86	+4	[EDRNAKR]	hPcf11	540	546	[QSGAKQSHMEEFTPPSR]	hPcf11	523	539	K	545	K	527	CF2_A_HCD35_dead
91	824.904	+4	[MIFEGPNKLSPR]	hPcf11	768	779	[YEDSDKPFVDSPASR]	hPcf11	718	732	K	775	K	723	CF2_A_HCD35_dead
90	474.672	+5	[AGKIR]	hPcf11	518	522	[SPFNDRFPLKRPR]	hPcf11	705	717	K	520	K	714	CF2_A_HCD35_dead
90	510.256	+6	[AGKIR]	hPcf11	518	522	[QSGAKQSHMEEFTPPSREDR]	hPcf11	523	542	K	520	K	527	CF2_A_HCD35_dead
89	759.774	+5	[YEDSDKPFVDSPASR]	hPcf11	718	732	[DGPTKMIFEGPNKLSPR]	hPcf11	763	779	K	723	K	767	CF2_A_HCD35_dead
88	529.288	+4	[AKSQFFEKVHEEVVLK]	hPcf11	1404	1419		Intrapeptidal			K	1405	K	1411	CF2_A_HCD35_dead
88	672.361	+3	[SGEKITKKELDQLDSK]	hPcf11	348	363		Intrapeptidal			K	351	K	354	CF2_A_HCD35_dead
82	662.04	+3	[KVTHRR]	hPcf11	1378	1383	[APKQQQHR]	hPcf11	636	643	K	1378	K	638	CF2_A_HCD35_dead
80	609.824	+4	[LKKHLQDKTDGKDDDVKEK]	hPcf11	404	422		Intrapeptidal			K	406	K	420	CF2_A_HCD35_dead
70	730.56	+5	[YEDSDKPFVDSPASR]	hPcf11	718	732	[HRESWSSTKGILSPR]	hPcf11	621	635	K	723	K	629	CF2_A_HCD35_dead
62	774.593	+5	[STKQDIRDPRR]	hPcf11	547	557	[MKKTEEERPQETTNQHSTK]	hPcf11	558	576	K	549	K	559	CF2_A_HCD35_dead
52	814.448	+4	[TVLLPKSGGVVER]	hClp1	276	288	[VMVVGPTDVGKSTVBR]	hClp1	117	132	K	281	K	127	CF2_A_HCD35_dead
47	820.656	+4	[RSTKQDIRDPR]	hPcf11	546	556	[YEDSDKPFVDSPASR]	hPcf11	718	732	K	549	K	723	CF2_A_HCD35_dead
143	407.73	+4	[AGKIR]	hPcf11	518	522	[EDRNAKR]	hPcf11	540	546	K	520	K	545	CF2_A_stHCD
116	543.305	+3	[AGKIR]	hPcf11	518	522	[EDRNAKR]	hPcf11	540	546	K	520	K	545	CF2_A_stHCD
112	414.97	+4	[FMDLK}	hClp1	421	426	[SKDFRR]	hClp1	289	294	K	425	K	290	CF2_A_stHCD
112	421.837	+5	[ELTLASKR]	hPcf11	655	662	[APKQQQHR]	hPcf11	636	643	K	661	K	638	CF2_A_stHCD
102	423.042	+5	[AGKIR]	hPcf11	518	522	[STKQDIRDPRR]	hPcf11	547	557	K	520	S	547	CF2_A_stHCD
102	580.885	+5	[APKQQQHR]	hPcf11	636	643	[YEDSDKPFVDSPASR]	hPcf11	718	732	K	638	K	723	CF2_A_stHCD
99	725.855	+4	[APKQQQHR]	hPcf11	636	643	[YEDSDKPFVDSPASR]	hPcf11	718	732	K	638	K	723	CF2_A_stHCD
90	613.809	+4	[AGKIR]	hPcf11	518	522	[YEDSDKPFVDSPASR]	hPcf11	718	732	K	520	K	723	CF2_A_stHCD
89	470.425	+6	[APKQQQHR]	hPcf11	636	643	[SPFNDRFPLKRPR]	hPcf11	705	717	K	638	K	714	CF2_A_stHCD
79	564.309	+5	[APKQQQHR]	hPcf11	636	643	[SPFNDRFPLKRPR]	hPcf11	705	717	K	638	K	714	CF2_A_stHCD
76	640.596	+4	[APKQQQHR]	hPcf11	636	643	[RSTKQDIRDPR]	hPcf11	546	556	K	638	K	549	CF2_A_stHCD
69	648.108	+5	[QAEKEEERGPR]	hClp1	106	116	[YEDSDKPFVDSPASR]	hPcf11	718	732	K	109	K	723	CF2_A_stHCD
68	614.579	+4	[EDRNAKR]	hPcf11	540	546	[RSTKQDIRDPR]	hPcf11	546	556	K	545	K	549	CF2_A_stHCD
146	418.23	+4	[KVTHR]	hPcf11	1378	1382	[TEKDVSR]	hPcf11	1371	1377	K	1378	K	1373	CF2_A_stHCD_dead
142	407.73	+4	[AGKIR]	hPcf11	518	522	[EDRNAKR]	hPcf11	540	546	K	520	K	545	CF2_A_stHCD_dead
141	557.305	+3	[KVTHR]	hPcf11	1378	1382	[TEKDVSR]	hPcf11	1371	1377	K	1378	K	1373	CF2_A_stHCD_dead
124	457.255	+4	[KVTHRR]	hPcf11	1378	1383	[TEKDVSR]	hPcf11	1371	1377	K	1378	K	1373	CF2_A_stHCD_dead
124	543.305	+3	[AGKIR]	hPcf11	518	522	[EDRNAKR]	hPcf11	540	546	K	520	K	545	CF2_A_stHCD_dead
120	700.345	+3	[LSHTKDLKNQESESMR]	hPcf11	378	393		Intrapeptidal			K	382	K	385	CF2_A_stHCD_dead
118	366.01	+5	[KVTHRR]	hPcf11	1378	1383	[TEKDVSR]	hPcf11	1371	1377	K	1378	K	1373	CF2_A_stHCD_dead
117	672.361	+3	[SGEKITKKELDQLDSK]	hPcf11	348	363		Intrapeptidal			K	351	K	355	CF2_A_stHCD_dead
116	334.785	+5	[KVTHR]	hPcf11	1378	1382	[TEKDVSR]	hPcf11	1371	1377	K	1378	K	1373	CF2_A_stHCD_dead
113	414.426	+5	[KVTHR]	hPcf11	1378	1382	[QNRTEKDVSR]	hPcf11	1368	1377	K	1378	K	1373	CF2_A_stHCD_dead
109	421.837	+5	[ELTLASKR]	hPcf11	655	662	[APKQQQHR]	hPcf11	636	643	K	661	K	638	CF2_A_stHCD_dead
109	767.068	+3	[EDRNAKR]	hPcf11	540	546	[STKQDIRDPR]	hPcf11	547	556	K	545	K	549	CF2_A_stHCD_dead
108	414.97	+4	[FMDLK}	hClp1	421	426	[SKDFRR]	hClp1	289	294	K	425	K	290	CF2_A_stHCD_dead
103	614.579	+4	[EDRNAKR]	hPcf11	540	546	[STKQDIRDPRR]	hPcf11	547	557	K	545	K	549	CF2_A_stHCD_dead
102	491.864	+5	[EDRNAKR]	hPcf11	540	546	[STKQDIRDPRR]	hPcf11	547	557	K	545	K	549	CF2_A_stHCD_dead
102	558.304	+4	[SGEKITKKELDQLDSKSK]	hPcf11	348	365		Intrapeptidal			K	351	K	363	CF2_A_stHCD_dead
102	609.338	+3	[KVTHRR]	hPcf11	1378	1383	[TEKDVSR]	hPcf11	1371	1377	K	1378	K	1373	CF2_A_stHCD_dead
102	664.838	+4	[AGKIR]	hPcf11	518	522	[QSGAKQSHMEEFTPPSR]	hPcf11	523	539	K	520	K	527	CF2_A_stHCD_dead
102	967.469	+3	[APKQQQHR]	hPcf11	636	643	[YEDSDKPFVDSPASR]	hPcf11	718	732	K	638	K	723	CF2_A_stHCD_dead
99	580.885	+5	[APKQQQHR]	hPcf11	636	643	[YEDSDKPFVDSPASR]	hPcf11	718	732	K	638	K	723	CF2_A_stHCD_dead
99	725.855	+4	[APKQQQHR]	hPcf11	636	643	[YEDSDKPFVDSPASR]	hPcf11	718	732	K	638	K	723	CF2_A_stHCD_dead
97	527.88	+5	[APKQQQHR]	hPcf11	636	643	[ESWSSTKGILSPR]	hPcf11	623	635	K	638	K	629	CF2_A_stHCD_dead
97	532.071	+5	[AGKIR]	hPcf11	518	522	[QSGAKQSHMEEFTPPSR]	hPcf11	523	539	K	520	K	527	CF2_A_stHCD_dead
96	612.106	+5	[AGKIR]	hPcf11	518	522	[QSGAKQSHMEEFTPPSREDR]	hPcf11	523	542	K	520	K	527	CF2_A_stHCD_dead
95	488.928	+6	[APKQQQHR]	hPcf11	636	643	[HRESWSSTKGILSPR]	hPcf11	621	635	K	638	K	629	CF2_A_stHCD_dead
95	659.598	+4	[APKQQQHR]	hPcf11	636	643	[ESWSSTKGILSPR]	hPcf11	623	635	K	638	K	629	CF2_A_stHCD_dead
93	586.512	+5	[APKQQQHR]	hPcf11	636	643	[HRESWSSTKGILSPR]	hPcf11	621	635	K	638	K	629	CF2_A_stHCD_dead
92	828.44	+3	[NKIINGIVQKQDTITEESEK]	hPcf11	447	466		Intrapeptidal			K	448	K	456	CF2_A_stHCD_dead
88	470.425	+6	[APKQQQHR]	hPcf11	636	643	[SPFNDRFPLKRPR]	hPcf11	705	717	K	638	K	714	CF2_A_stHCD_dead
87	613.809	+4	[AGKIR]	hPcf11	518	522	[YEDSDKPFVDSPASR]	hPcf11	718	732	K	520	K	723	CF2_A_stHCD_dead
86	510.256	+6	[AGKIR]	hPcf11	518	522	[QSGAKQSHMEEFTPPSREDR]	hPcf11	523	542	K	520	K	527	CF2_A_stHCD_dead
85	978.704	+4	[TEEERPQETTNQHSTKSGTEPKENVENWQSSK]	hPcf11	561	592		Intrapeptidal			K	576	K	582	CF2_A_stHCD_dead
64	472.47	+5	[SKDFRR]	hClp1	289	294	[TVLLPKSGGVVER]	hClp1	276	288	K	290	K	281	CF2_A_stHCD_dead
152	411.981	+4	[FMDLK}	hClp1	421	426	[KVTHRR]	hPcf11	1378	1383	K	425	K	1378	CF2_B_HCD30
148	414.969	+4	[FMDLK}	hClp1	421	426	[SKDFRR]	hClp1	289	294	K	425	K	290	CF2_B_HCD30
144	527.046	+4	[ELTLASKR]	hPcf11	655	662	[APKQQQHR]	hPcf11	636	643	K	661	K	638	CF2_B_HCD30
141	457.76	+4	[KVTHR]	hPcf11	1378	1382	[APKQQQHR]	hPcf11	636	643	K	1378	K	638	CF2_B_HCD30
139	421.838	+5	[ELTLASKR]	hPcf11	655	662	[APKQQQHR]	hPcf11	636	643	K	661	K	638	CF2_B_HCD30
136	702.392	+3	[ELTLASKR]	hPcf11	655	662	[APKQQQHR]	hPcf11	636	643	K	661	K	638	CF2_B_HCD30
135	784.789	+3	[QQLLAKQK]	hPcf11	206	213	[KLELELEQAK]	hPcf11	222	231	K	211	K	222	CF2_B_HCD30
132	500.922	+3	[SKDFR]	hClp1	289	293	[FMDLK}	hClp1	421	426	K	290	K	425	CF2_B_HCD30
131	610.007	+3	[KVTHR]	hPcf11	1378	1382	[APKQQQHR]	hPcf11	636	643	K	1378	K	638	CF2_B_HCD30
131	724.716	+3	[AKSQFFEK]	hPcf11	1404	1411	[APKQQQHR]	hPcf11	636	643	K	1405	K	638	CF2_B_HCD30
130	506.268	+4	[TEKDVSR]	hPcf11	1371	1377	[APKQQQHR]	hPcf11	636	643	K	1373	K	638	CF2_B_HCD30
129	543.788	+4	[AKSQFFEK]	hPcf11	1404	1411	[APKQQQHR]	hPcf11	636	643	K	1405	K	638	CF2_B_HCD30
126	496.782	+4	[KVTHRR]	hPcf11	1378	1383	[APKQQQHR]	hPcf11	636	643	K	1378	K	638	CF2_B_HCD30
125	418.97	+4	[FmDLK}	hClp1	421	426	[SKDFRR]	hClp1	289	294	K	425	K	290	CF2_B_HCD30
125	967.47	+3	[APKQQQHR]	hPcf11	636	643	[YEDSDKPFVDSPASR]	hPcf11	718	732	K	638	S	721	CF2_B_HCD30
125	407.731	+4	[AGKIR]	hPcf11	518	522	[EDRNAKR]	hPcf11	540	546	K	520	K	545	CF2_B_HCD30
124	346.464	+4	[AGKIR]	hPcf11	518	522	[RSPKR]	hPcf11	501	505	K	520	K	504	CF2_B_HCD30
120	607.332	+3	[KVTHR]	hPcf11	1378	1382	[AKSQFFEK]	hPcf11	1404	1411	K	1378	K	1405	CF2_B_HCD30
118	730.56	+5	[YEDSDKPFVDSPASR]	hPcf11	718	732	[HRESWSSTKGILSPR]	hPcf11	621	635	K	723	S	627	CF2_B_HCD30
115	387.72	+4	[AGKIR]	hPcf11	518	522	[SKDFRR]	hClp1	289	294	K	520	K	290	CF2_B_HCD30
115	653.736	+5	[QAEKEEERGPR]	hClp1	106	116	[HRESWSSTKGILSPR]	hPcf11	621	635	K	109	K	629	CF2_B_HCD30
111	397.627	+5	[KVTHRR]	hPcf11	1378	1383	[APKQQQHR]	hPcf11	636	643	K	1378	K	638	CF2_B_HCD30
111	588.843	+4	[QQLLAKQK]	hPcf11	206	213	[KLELELEQAK]	hPcf11	222	231	K	211	K	222	CF2_B_HCD30
111	674.689	+3	[TEKDVSR]	hPcf11	1371	1377	[APKQQQHR]	hPcf11	636	643	K	1373	K	638	CF2_B_HCD30
110	759.773	+5	[YEDSDKPFVDSPASR]	hPcf11	718	732	[DGPTKMIFEGPNKLSPR]	hPcf11	763	779	K	723	K	767	CF2_B_HCD30
106	326.386	+5	[AGKIR]	hPcf11	518	522	[EDRNAKR]	hPcf11	540	546	K	520	K	545	CF2_B_HCD30
106	725.855	+4	[APKQQQHR]	hPcf11	636	643	[YEDSDKPFVDSPASR]	hPcf11	718	732	K	638	K	723	CF2_B_HCD30
105	603.813	+4	[KFTFDAGAK]	hClp1	54	62	[QNRTEKDVSR]	hPcf11	1368	1377	K	54	T	1371	CF2_B_HCD30
105	686.327	+4	[TEKDVSR]	hPcf11	1371	1377	[YEDSDKPFVDSPASR]	hPcf11	718	732	K	1373	K	723	CF2_B_HCD30
103	469.028	+4	[SPKRR]	hPcf11	502	506	[SPIIHSPKR]	hPcf11	489	497	K	504	K	496	CF2_B_HCD30
103	489.525	+4	[AGKIR]	hPcf11	518	522	[STKQDIRDPR]	hPcf11	547	556	K	520	K	549	CF2_B_HCD30
103	629.824	+4	[APKQQQHR]	hPcf11	636	643	[QAEKEEERGPR]	hClp1	106	116	K	638	K	109	CF2_B_HCD30
101	573.561	+4	[APKQQQHR]	hPcf11	636	643	[ELLQKTSER]	hPcf11	663	671	K	638	S	669	CF2_B_HCD30
100	474.672	+5	[AGKIR]	hPcf11	518	522	[SPFNDRFPLKRPR]	hPcf11	705	717	K	520	K	714	CF2_B_HCD30
100	1114.53	+3	[DGPTKMIFEGPNK]	hPcf11	763	775	[YEDSDKPFVDSPASR]	hPcf11	718	732	T	766	K	723	CF2_B_HCD30
99	366.407	+5	[KVTHR]	hPcf11	1378	1382	[APKQQQHR]	hPcf11	636	643	K	1378	K	638	CF2_B_HCD30
98	912.948	+4	[YEDSDKPFVDSPASR]	hPcf11	718	732	[HRESWSSTKGILSPR]	hPcf11	621	635	K	723	S	633	CF2_B_HCD30
95	470.425	+6	[APKQQQHR]	hPcf11	636	643	[SPFNDRFPLKRPR]	hPcf11	705	717	K	638	K	714	CF2_B_HCD30
95	644.844	+4	[APKQQQHR]	hPcf11	636	643	[MIFEGPNKLSPR]	hPcf11	768	779	K	638	K	775	CF2_B_HCD30
94	552.956	+3	[FMDLK}	hClp1	421	426	[SKDFRR]	hClp1	289	294	K	425	K	290	CF2_B_HCD30
93	580.885	+5	[APKQQQHR]	hPcf11	636	643	[YEDSDKPFVDSPASR]	hPcf11	718	732	K	638	S	721	CF2_B_HCD30
92	824.904	+4	[MIFEGPNKLSPR]	hPcf11	768	779	[YEDSDKPFVDSPASR]	hPcf11	718	732	S	777	K	723	CF2_B_HCD30
91	592.515	+5	[APKQQQHR]	hPcf11	636	643	[SLQQVDEHSKPPHLR]	hPcf11	606	620	K	638	K	615	CF2_B_HCD30
90	592.921	+5	[LYNKITSR]	hClp1	199	206	[SLQQVDEHSKPPHLR]	hPcf11	606	620	K	202	K	615	CF2_B_HCD30
88	504.061	+5	[APKQQQHR]	hPcf11	636	643	[QAEKEEERGPR]	hClp1	106	116	K	638	K	109	CF2_B_HCD30
87	570.965	+6	[RQAEKEEERGPR]	hClp1	105	116	[HRESWSSTKGILSPR]	hPcf11	621	635	K	109	K	629	CF2_B_HCD30
87	705.134	+4	[APKQQQHR]	hPcf11	636	643	[SPFNDRFPLKRPR]	hPcf11	705	717	K	638	K	714	CF2_B_HCD30
85	648.109	+5	[QAEKEEERGPR]	hClp1	106	116	[YEDSDKPFVDSPASR]	hPcf11	718	732	K	109	K	723	CF2_B_HCD30
85	962.745	+4	[YEDSDKPFVDSPASR]	hPcf11	718	732	[LSVDANLQIPKELTLASK]	hPcf11	644	661	K	723	S	660	CF2_B_HCD30
82	726.361	+4	[LYNKITSR]	hClp1	199	206	[YEDSDKPFVDSPASR]	hPcf11	718	732	K	202	K	723	CF2_B_HCD30
81	613.809	+4	[AGKIR]	hPcf11	518	522	[YEDSDKPFVDSPASR]	hPcf11	718	732	K	520	K	723	CF2_B_HCD30
79	733.396	+4	[LYNKITSR]	hClp1	199	206	[HRESWSSTKGILSPR]	hPcf11	621	635	K	202	T	628	CF2_B_HCD30
75	549.949	+6	[QAEKEEERGPR]	hClp1	106	116	[SLQQVDEHSKPPHLR]	hPcf11	606	620	K	109	S	614	CF2_B_HCD30
73	625.506	+5	[STKQDIRDPR]	hPcf11	547	556	[YEDSDKPFVDSPASR]	hPcf11	718	732	K	549	K	723	CF2_B_HCD30
66	612.322	+4	[FEGSPGLR]	hPcf11	848	855	[MIFEGPNKLSPR]	hPcf11	768	779	S	851	K	775	CF2_B_HCD30
163	557.306	+3	[KVTHR]	hPcf11	1378	1382	[TEKDVSR]	hPcf11	1371	1377	K	1378	K	1373	CF2_B_HCD30_dead
148	411.981	+4	[FMDLK}	hClp1	421	426	[KVTHRR]	hPcf11	1378	1383	K	425	K	1378	CF2_B_HCD30_dead
145	414.969	+4	[FMDLK}	hClp1	421	426	[SKDFRR]	hClp1	289	294	K	425	K	290	CF2_B_HCD30_dead
142	527.046	+4	[ELTLASKR]	hPcf11	655	662	[APKQQQHR]	hPcf11	636	643	K	661	K	638	CF2_B_HCD30_dead
141	586.512	+5	[APKQQQHR]	hPcf11	636	643	[HRESWSSTKGILSPR]	hPcf11	621	635	K	638	K	629	CF2_B_HCD30_dead
138	421.838	+5	[ELTLASKR]	hPcf11	655	662	[APKQQQHR]	hPcf11	636	643	K	661	K	638	CF2_B_HCD30_dead
137	457.76	+4	[KVTHR]	hPcf11	1378	1382	[APKQQQHR]	hPcf11	636	643	K	1378	K	638	CF2_B_HCD30_dead
137	418.231	+4	[KVTHR]	hPcf11	1378	1382	[TEKDVSR]	hPcf11	1371	1377	K	1378	K	1373	CF2_B_HCD30_dead
136	610.34	+3	[ITKKELDQLDSKSK]	hPcf11	352	365		Intrapeptidal			K	355	K	363	CF2_B_HCD30_dead
135	363.225	+3	[KSLFKLR]	hPcf11	113	119		Intrapeptidal			K	113	K	117	CF2_B_HCD30_dead
134	588.643	+3	[SKSGEK]	hPcf11	346	351	[LNSSKQEK]	hPcf11	338	345	K	347	K	342	CF2_B_HCD30_dead
134	784.789	+3	[QQLLAKQK]	hPcf11	206	213	[KLELELEQAK]	hPcf11	222	231	K	211	K	222	CF2_B_HCD30_dead
133	517.782	+4	[KVTHR]	hPcf11	1378	1382	[QNRTEKDVSR]	hPcf11	1368	1377	K	1378	K	1373	CF2_B_HCD30_dead
132	702.392	+3	[ELTLASKR]	hPcf11	655	662	[APKQQQHR]	hPcf11	636	643	K	661	K	638	CF2_B_HCD30_dead
128	407.731	+4	[AGKIR]	hPcf11	518	522	[EDRNAKR]	hPcf11	540	546	K	520	K	545	CF2_B_HCD30_dead
128	504.262	+4	[TEKDVSR]	hPcf11	1371	1377	[KFTFDAGAK]	hClp1	54	62	K	1373	K	54	CF2_B_HCD30_dead
128	879.129	+3	[APKQQQHR]	hPcf11	636	643	[ESWSSTKGILSPR]	hPcf11	623	635	K	638	K	629	CF2_B_HCD30_dead
127	506.268	+4	[TEKDVSR]	hPcf11	1371	1377	[APKQQQHR]	hPcf11	636	643	K	1373	K	638	CF2_B_HCD30_dead
127	672.014	+3	[TEKDVSR]	hPcf11	1371	1377	[KFTFDAGAK]	hClp1	54	62	K	1373	K	54	CF2_B_HCD30_dead
127	767.068	+3	[EDRNAKR]	hPcf11	540	546	[STKQDIRDPR]	hPcf11	547	556	K	545	K	549	CF2_B_HCD30_dead
126	610.007	+3	[KVTHR]	hPcf11	1378	1382	[APKQQQHR]	hPcf11	636	643	K	1378	K	638	CF2_B_HCD30_dead
126	724.716	+3	[AKSQFFEK]	hPcf11	1404	1411	[APKQQQHR]	hPcf11	636	643	K	1405	K	638	CF2_B_HCD30_dead
125	457.256	+4	[KVTHRR]	hPcf11	1378	1383	[TEKDVSR]	hPcf11	1371	1377	K	1378	K	1373	CF2_B_HCD30_dead
125	543.788	+4	[AKSQFFEK]	hPcf11	1404	1411	[APKQQQHR]	hPcf11	636	643	K	1405	K	638	CF2_B_HCD30_dead
124	563.774	+4	[TAEKKDKDEHMKSSEHR]	hPcf11	425	441		Intrapeptidal			K	431	K	436	CF2_B_HCD30_dead
124	700.345	+3	[LSHTKDLKNQESESMR]	hPcf11	378	393		Intrapeptidal			K	382	K	385	CF2_B_HCD30_dead
123	967.47	+3	[APKQQQHR]	hPcf11	636	643	[YEDSDKPFVDSPASR]	hPcf11	718	732	K	638	K	723	CF2_B_HCD30_dead
123	705.383	+3	[AKSQFFEKVHEEVVLK]	hPcf11	1404	1419		Intrapeptidal			K	1405	K	1411	CF2_B_HCD30_dead
120	414.427	+5	[KVTHR]	hPcf11	1378	1382	[QNRTEKDVSR]	hPcf11	1368	1377	K	1378	K	1373	CF2_B_HCD30_dead
119	346.464	+4	[AGKIR]	hPcf11	518	522	[RSPKR]	hPcf11	501	505	K	520	K	504	CF2_B_HCD30_dead
119	496.782	+4	[KVTHRR]	hPcf11	1378	1383	[APKQQQHR]	hPcf11	636	643	K	1378	K	638	CF2_B_HCD30_dead
117	672.361	+3	[SGEKITKKELDQLDSK]	hPcf11	348	363		Intrapeptidal			K	351	K	355	CF2_B_HCD30_dead
116	588.843	+4	[QQLLAKQK]	hPcf11	206	213	[KLELELEQAK]	hPcf11	222	231	K	211	K	222	CF2_B_HCD30_dead
116	730.56	+5	[YEDSDKPFVDSPASR]	hPcf11	718	732	[HRESWSSTKGILSPR]	hPcf11	621	635	K	723	K	629	CF2_B_HCD30_dead
114	653.736	+5	[QAEKEEERGPR]	hClp1	106	116	[HRESWSSTKGILSPR]	hPcf11	621	635	K	109	K	629	CF2_B_HCD30_dead
114	711.752	+3	[QQLLAKQKQLLELQQK]	hPcf11	206	221		Intrapeptidal			K	211	K	213	CF2_B_HCD30_dead
113	629.303	+4	[mKKTEEERPQETTNQHSTK]	hPcf11	558	576		Intrapeptidal			K	559	K	560	CF2_B_HCD30_dead
113	732.889	+4	[APKQQQHR]	hPcf11	636	643	[HRESWSSTKGILSPR]	hPcf11	621	635	K	638	K	629	CF2_B_HCD30_dead
111	334.786	+5	[KVTHR]	hPcf11	1378	1382	[TEKDVSR]	hPcf11	1371	1377	K	1378	K	1373	CF2_B_HCD30_dead
110	664.839	+4	[AGKIR]	hPcf11	518	522	[QSGAKQSHMEEFTPPSR]	hPcf11	523	539	K	520	K	527	CF2_B_HCD30_dead
109	397.627	+5	[KVTHRR]	hPcf11	1378	1383	[APKQQQHR]	hPcf11	636	643	K	1378	K	638	CF2_B_HCD30_dead
109	472.471	+5	[SKDFRR]	hClp1	289	294	[TVLLPKSGGVVER]	hClp1	276	288	K	290	K	281	CF2_B_HCD30_dead
109	659.599	+4	[APKQQQHR]	hPcf11	636	643	[ESWSSTKGILSPR]	hPcf11	623	635	K	638	K	629	CF2_B_HCD30_dead
108	759.773	+5	[YEDSDKPFVDSPASR]	hPcf11	718	732	[DGPTKMIFEGPNKLSPR]	hPcf11	763	779	K	723	K	767	CF2_B_HCD30_dead
107	366.006	+5	[KVTHRR]	hPcf11	1378	1383	[TEKDVSR]	hPcf11	1371	1377	K	1378	K	1373	CF2_B_HCD30_dead
107	793.117	+3	[QLLELQQKKLELELEQAK]	hPcf11	214	231		Intrapeptidal			K	221	K	222	CF2_B_HCD30_dead
106	674.689	+3	[TEKDVSR]	hPcf11	1371	1377	[APKQQQHR]	hPcf11	636	643	K	1373	K	638	CF2_B_HCD30_dead
103	326.386	+5	[AGKIR]	hPcf11	518	522	[EDRNAKR]	hPcf11	540	546	K	520	K	545	CF2_B_HCD30_dead
103	423.042	+5	[AGKIR]	hPcf11	518	522	[STKQDIRDPRR]	hPcf11	547	557	K	520	K	549	CF2_B_HCD30_dead
103	527.881	+5	[APKQQQHR]	hPcf11	636	643	[ESWSSTKGILSPR]	hPcf11	623	635	K	638	K	629	CF2_B_HCD30_dead
103	575.552	+4	[EDRNAKR]	hPcf11	540	546	[STKQDIRDPR]	hPcf11	547	556	K	545	K	549	CF2_B_HCD30_dead
103	686.327	+4	[TEKDVSR]	hPcf11	1371	1377	[YEDSDKPFVDSPASR]	hPcf11	718	732	K	1373	K	723	CF2_B_HCD30_dead
103	725.855	+4	[APKQQQHR]	hPcf11	636	643	[YEDSDKPFVDSPASR]	hPcf11	718	732	K	638	K	723	CF2_B_HCD30_dead
102	544.948	+6	[QAEKEEERGPR]	hClp1	106	116	[HRESWSSTKGILSPR]	hPcf11	621	635	K	109	K	629	CF2_B_HCD30_dead
101	488.928	+6	[APKQQQHR]	hPcf11	636	643	[HRESWSSTKGILSPR]	hPcf11	621	635	K	638	K	629	CF2_B_HCD30_dead
101	612.106	+5	[AGKIR]	hPcf11	518	522	[QSGAKQSHMEEFTPPSREDR]	hPcf11	523	542	K	520	K	527	CF2_B_HCD30_dead
101	629.824	+4	[APKQQQHR]	hPcf11	636	643	[QAEKEEERGPR]	hClp1	106	116	K	638	K	109	CF2_B_HCD30_dead
100	573.561	+4	[APKQQQHR]	hPcf11	636	643	[ELLQKTSER]	hPcf11	663	671	K	638	K	667	CF2_B_HCD30_dead
99	695.027	+3	[DGPTKMIFEGPNKLSPR]	hPcf11	763	779		Intrapeptidal			K	767	K	775	CF2_B_HCD30_dead
99	849.479	+4	[ELLQKTSER]	hPcf11	663	671	[LSVDANLQIPKELTLASKR]	hPcf11	644	662	K	667	K	661	CF2_B_HCD30_dead
98	489.525	+4	[AGKIR]	hPcf11	518	522	[STKQDIRDPR]	hPcf11	547	556	K	520	K	549	CF2_B_HCD30_dead
97	469.028	+4	[SPKRR]	hPcf11	502	506	[SPIIHSPKR]	hPcf11	489	497	K	504	K	496	CF2_B_HCD30_dead
97	618.659	+6	[HRESWSSTKGILSPR]	hPcf11	621	635	[SLQQVDEHSKPPHLR]	hPcf11	606	620	K	629	K	615	CF2_B_HCD30_dead
97	1114.53	+3	[DGPTKMIFEGPNK]	hPcf11	763	775	[YEDSDKPFVDSPASR]	hPcf11	718	732	K	767	K	723	CF2_B_HCD30_dead
96	474.672	+5	[AGKIR]	hPcf11	518	522	[SPFNDRFPLKRPR]	hPcf11	705	717	K	520	K	714	CF2_B_HCD30_dead
93	679.78	+5	[ELLQKTSER]	hPcf11	663	671	[LSVDANLQIPKELTLASKR]	hPcf11	644	662	K	667	K	661	CF2_B_HCD30_dead
93	659.127	+4	[QKQLLELQQKKLELELEQAK]	hPcf11	212	231		Intrapeptidal			K	213	K	221	CF2_B_HCD30_dead
91	521.522	+4	[DGPTKMIFEGPNKLSPR]	hPcf11	763	779		Intrapeptidal			K	767	K	775	CF2_B_HCD30_dead
91	580.885	+5	[APKQQQHR]	hPcf11	636	643	[YEDSDKPFVDSPASR]	hPcf11	718	732	K	638	K	723	CF2_B_HCD30_dead
89	592.515	+5	[APKQQQHR]	hPcf11	636	643	[SLQQVDEHSKPPHLR]	hPcf11	606	620	K	638	K	615	CF2_B_HCD30_dead
89	592.921	+5	[LYNKITSR]	hClp1	199	206	[SLQQVDEHSKPPHLR]	hPcf11	606	620	K	202	K	615	CF2_B_HCD30_dead
88	474.917	+3	[NKKFTFDAGAK]	hClp1	52	62		Intrapeptidal			K	53	K	54	CF2_B_HCD30_dead
87	516.076	+5	[APKQQQHR]	hPcf11	636	643	[MIFEGPNKLSPR]	hPcf11	768	779	K	638	K	775	CF2_B_HCD30_dead
86	510.256	+6	[AGKIR]	hPcf11	518	522	[QSGAKQSHMEEFTPPSREDR]	hPcf11	523	542	K	520	K	527	CF2_B_HCD30_dead
86	797.433	+3	[STWDEIFPLKKLYALDVR]	hPcf11	120	137		Intrapeptidal			K	129	K	130	CF2_B_HCD30_dead
84	586.045	+4	[NKLSHTKDLKNQESESMR]	hPcf11	376	393		Intrapeptidal			K	377	K	382	CF2_B_HCD30_dead
80	726.361	+4	[LYNKITSR]	hClp1	199	206	[YEDSDKPFVDSPASR]	hPcf11	718	732	K	202	K	723	CF2_B_HCD30_dead
161	702.392	+3	[ELTLASKR]	hPcf11	655	662	[APKQQQHR]	hPcf11	636	643	K	661	K	638	CF2_B_HCD35
148	414.968	+4	[FMDLK}	hClp1	421	426	[SKDFRR]	hClp1	289	294	K	425	K	290	CF2_B_HCD35
148	674.688	+3	[TEKDVSR]	hPcf11	1371	1377	[APKQQQHR]	hPcf11	636	643	S	1376	K	638	CF2_B_HCD35
147	610.01	+3	[KVTHR]	hPcf11	1378	1382	[APKQQQHR]	hPcf11	636	643	K	1378	K	638	CF2_B_HCD35
147	724.716	+3	[AKSQFFEK]	hPcf11	1404	1411	[APKQQQHR]	hPcf11	636	643	K	1405	K	638	CF2_B_HCD35
146	411.981	+4	[FMDLK}	hClp1	421	426	[KVTHRR]	hPcf11	1378	1383	K	425	K	1378	CF2_B_HCD35
145	500.92	+3	[SKDFR]	hClp1	289	293	[FMDLK}	hClp1	421	426	K	290	K	425	CF2_B_HCD35
143	573.561	+4	[APKQQQHR]	hPcf11	636	643	[ELLQKTSER]	hPcf11	663	671	K	638	T	668	CF2_B_HCD35
140	784.789	+3	[QQLLAKQK]	hPcf11	206	213	[KLELELEQAK]	hPcf11	222	231	K	211	K	222	CF2_B_HCD35
138	527.046	+4	[ELTLASKR]	hPcf11	655	662	[APKQQQHR]	hPcf11	636	643	K	661	K	638	CF2_B_HCD35
138	543.305	+3	[AGKIR]	hPcf11	518	522	[EDRNAKR]	hPcf11	540	546	K	520	K	545	CF2_B_HCD35
136	506.267	+4	[TEKDVSR]	hPcf11	1371	1377	[APKQQQHR]	hPcf11	636	643	K	1373	K	638	CF2_B_HCD35
135	588.844	+4	[QQLLAKQK]	hPcf11	206	213	[KLELELEQAK]	hPcf11	222	231	K	211	K	222	CF2_B_HCD35
135	605.819	+4	[APKQQQHR]	hPcf11	636	643	[QNRTEKDVSR]	hPcf11	1368	1377	K	638	K	1373	CF2_B_HCD35
134	705.13	+4	[APKQQQHR]	hPcf11	636	643	[SPFNDRFPLKRPR]	hPcf11	705	717	K	638	K	714	CF2_B_HCD35
133	607.332	+3	[KVTHR]	hPcf11	1378	1382	[AKSQFFEK]	hPcf11	1404	1411	K	1378	K	1405	CF2_B_HCD35
132	418.967	+4	[FmDLK}	hClp1	421	426	[SKDFRR]	hClp1	289	294	K	425	K	290	CF2_B_HCD35
126	407.73	+4	[AGKIR]	hPcf11	518	522	[EDRNAKR]	hPcf11	540	546	K	520	K	545	CF2_B_HCD35
125	504.261	+4	[TEKDVSR]	hPcf11	1371	1377	[AKSQFFEK]	hPcf11	1404	1411	K	1373	K	1405	CF2_B_HCD35
124	649.69	+3	[TEKDVSR]	hPcf11	1371	1377	[ELTLASKR]	hPcf11	655	662	S	1376	K	661	CF2_B_HCD35
122	692.699	+3	[EDRNAKR]	hPcf11	540	546	[APKQQQHR]	hPcf11	636	643	K	545	K	638	CF2_B_HCD35
121	552.956	+3	[FMDLK}	hClp1	421	426	[SKDFRR]	hClp1	289	294	K	425	K	290	CF2_B_HCD35
120	421.838	+5	[ELTLASKR]	hPcf11	655	662	[APKQQQHR]	hPcf11	636	643	K	661	K	638	CF2_B_HCD35
120	457.757	+4	[KVTHR]	hPcf11	1378	1382	[APKQQQHR]	hPcf11	636	643	K	1378	K	638	CF2_B_HCD35
118	496.782	+4	[KVTHRR]	hPcf11	1378	1383	[APKQQQHR]	hPcf11	636	643	K	1378	K	638	CF2_B_HCD35
117	346.464	+4	[AGKIR]	hPcf11	518	522	[RSPKR]	hPcf11	501	505	K	520	K	504	CF2_B_HCD35
116	430.002	+4	[RSPKR]	hPcf11	501	505	[SPIIHSPK]	hPcf11	489	496	K	504	S	494	CF2_B_HCD35
116	653.737	+5	[QAEKEEERGPR]	hClp1	106	116	[HRESWSSTKGILSPR]	hPcf11	621	635	K	109	K	629	CF2_B_HCD35
115	487.52	+4	[TEKDVSR]	hPcf11	1371	1377	[ELTLASKR]	hPcf11	655	662	K	1373	K	661	CF2_B_HCD35
115	629.824	+4	[APKQQQHR]	hPcf11	636	643	[QAEKEEERGPR]	hClp1	106	116	K	638	K	109	CF2_B_HCD35
112	543.789	+4	[AKSQFFEK]	hPcf11	1404	1411	[APKQQQHR]	hPcf11	636	643	K	1405	K	638	CF2_B_HCD35
111	489.525	+4	[AGKIR]	hPcf11	518	522	[STKQDIRDPR]	hPcf11	547	556	K	520	K	549	CF2_B_HCD35
111	730.56	+5	[YEDSDKPFVDSPASR]	hPcf11	718	732	[HRESWSSTKGILSPR]	hPcf11	621	635	K	723	K	629	CF2_B_HCD35
109	474.672	+5	[AGKIR]	hPcf11	518	522	[SPFNDRFPLKRPR]	hPcf11	705	717	K	520	K	714	CF2_B_HCD35
109	548.972	+3	[FMDLK}	hClp1	421	426	[KVTHRR]	hPcf11	1378	1383	K	425	K	1378	CF2_B_HCD35
109	639.045	+3	[TEKDVSR]	hPcf11	1371	1377	[LLKTGILK]	hPcf11	1276	1283	S	1376	K	1278	CF2_B_HCD35
109	672.014	+3	[TEKDVSR]	hPcf11	1371	1377	[AKSQFFEK]	hPcf11	1404	1411	S	1376	K	1405	CF2_B_HCD35
109	931.828	+3	[LLKTGILK]	hPcf11	1276	1283	[YEDSDKPFVDSPASR]	hPcf11	718	732	K	1278	K	723	CF2_B_HCD35
107	725.854	+4	[APKQQQHR]	hPcf11	636	643	[YEDSDKPFVDSPASR]	hPcf11	718	732	K	638	K	723	CF2_B_HCD35
107	967.47	+3	[APKQQQHR]	hPcf11	636	643	[YEDSDKPFVDSPASR]	hPcf11	718	732	K	638	S	721	CF2_B_HCD35
106	455.751	+4	[KVTHR]	hPcf11	1378	1382	[AKSQFFEK]	hPcf11	1404	1411	K	1378	K	1405	CF2_B_HCD35
106	1114.53	+3	[DGPTKMIFEGPNK]	hPcf11	763	775	[YEDSDKPFVDSPASR]	hPcf11	718	732	K	767	K	723	CF2_B_HCD35
105	519.063	+4	[LLKTGILK]	hPcf11	1276	1283	[APKQQQHR]	hPcf11	636	643	K	1278	K	638	CF2_B_HCD35
105	660.107	+4	[LYNKITSR]	hClp1	199	206	[ESWSSTKGILSPR]	hPcf11	623	635	K	202	S	633	CF2_B_HCD35
104	686.328	+4	[TEKDVSR]	hPcf11	1371	1377	[YEDSDKPFVDSPASR]	hPcf11	718	732	S	1376	K	723	CF2_B_HCD35
101	470.425	+6	[APKQQQHR]	hPcf11	636	643	[SPFNDRFPLKRPR]	hPcf11	705	717	K	638	K	714	CF2_B_HCD35
101	504.06	+5	[APKQQQHR]	hPcf11	636	643	[QAEKEEERGPR]	hClp1	106	116	K	638	K	109	CF2_B_HCD35
101	571.513	+5	[ELTLASKR]	hPcf11	655	662	[HRESWSSTKGILSPR]	hPcf11	621	635	K	661	S	624	CF2_B_HCD35
100	592.514	+5	[APKQQQHR]	hPcf11	636	643	[SLQQVDEHSKPPHLR]	hPcf11	606	620	K	638	K	615	CF2_B_HCD35
100	699.123	+4	[LLKTGILK]	hPcf11	1276	1283	[YEDSDKPFVDSPASR]	hPcf11	718	732	K	1278	K	723	CF2_B_HCD35
98	824.904	+4	[MIFEGPNKLSPR]	hPcf11	768	779	[YEDSDKPFVDSPASR]	hPcf11	718	732	S	777	K	723	CF2_B_HCD35
97	433.751	+4	[AGKIR]	hPcf11	518	522	[APKQQQHR]	hPcf11	636	643	K	520	K	638	CF2_B_HCD35
97	659.366	+3	[KVTHRR]	hPcf11	1378	1383	[AKSQFFEK]	hPcf11	1404	1411	K	1378	K	1405	CF2_B_HCD35
90	629.356	+4	[LLKTGILK]	hPcf11	1276	1283	[DGPTKMIFEGPNK]	hPcf11	763	775	K	1278	K	767	CF2_B_HCD35
90	962.747	+4	[YEDSDKPFVDSPASR]	hPcf11	718	732	[LSVDANLQIPKELTLASK]	hPcf11	644	661	K	723	S	660	CF2_B_HCD35
89	683.559	+5	[ESWSSTKGILSPR]	hPcf11	623	635	[SLQQVDEHSKPPHLR]	hPcf11	606	620	S	633	K	615	CF2_B_HCD35
85	554.891	+5	[TEKDVSR]	hPcf11	1371	1377	[HRESWSSTKGILSPR]	hPcf11	621	635	K	1373	S	633	CF2_B_HCD35
78	603.813	+4	[KFTFDAGAK]	hClp1	54	62	[QNRTEKDVSR]	hPcf11	1368	1377	K	54	T	1371	CF2_B_HCD35
76	644.851	+4	[KVTHR]	hPcf11	1378	1382	[HRESWSSTKGILSPR]	hPcf11	621	635	K	1378	K	629	CF2_B_HCD35
66	639.351	+4	[KVTHR]	hPcf11	1378	1382	[SQFFEKVHEEVVLK]	hPcf11	1406	1419	K	1378	K	1411	CF2_B_HCD35
162	702.392	+3	[ELTLASKR]	hPcf11	655	662	[APKQQQHR]	hPcf11	636	643	K	661	K	638	CF2_B_HCD35_dead
160	557.305	+3	[KVTHR]	hPcf11	1378	1382	[TEKDVSR]	hPcf11	1371	1377	K	1378	K	1373	CF2_B_HCD35_dead
145	500.92	+3	[SKDFR]	hClp1	289	293	[FMDLK}	hClp1	421	426	K	290	K	425	CF2_B_HCD35_dead
145	609.339	+3	[KVTHRR]	hPcf11	1378	1383	[TEKDVSR]	hPcf11	1371	1377	K	1378	K	1373	CF2_B_HCD35_dead
144	414.968	+4	[FMDLK}	hClp1	421	426	[SKDFRR]	hClp1	289	294	K	425	K	290	CF2_B_HCD35_dead
143	411.981	+4	[FMDLK}	hClp1	421	426	[KVTHRR]	hPcf11	1378	1383	K	425	K	1378	CF2_B_HCD35_dead
142	879.128	+3	[APKQQQHR]	hPcf11	636	643	[ESWSSTKGILSPR]	hPcf11	623	635	K	638	K	629	CF2_B_HCD35_dead
141	724.716	+3	[AKSQFFEK]	hPcf11	1404	1411	[APKQQQHR]	hPcf11	636	643	K	1405	K	638	CF2_B_HCD35_dead
140	610.01	+3	[KVTHR]	hPcf11	1378	1382	[APKQQQHR]	hPcf11	636	643	K	1378	K	638	CF2_B_HCD35_dead
140	573.561	+4	[APKQQQHR]	hPcf11	636	643	[ELLQKTSER]	hPcf11	663	671	K	638	K	667	CF2_B_HCD35_dead
140	784.789	+3	[QQLLAKQK]	hPcf11	206	213	[KLELELEQAK]	hPcf11	222	231	K	211	K	222	CF2_B_HCD35_dead
139	543.305	+3	[AGKIR]	hPcf11	518	522	[EDRNAKR]	hPcf11	540	546	K	520	K	545	CF2_B_HCD35_dead
139	588.844	+4	[QQLLAKQK]	hPcf11	206	213	[KLELELEQAK]	hPcf11	222	231	K	211	K	222	CF2_B_HCD35_dead
138	674.688	+3	[TEKDVSR]	hPcf11	1371	1377	[APKQQQHR]	hPcf11	636	643	K	1373	K	638	CF2_B_HCD35_dead
136	363.225	+3	[KSLFKLR]	hPcf11	113	119		Intrapeptidal			K	113	K	117	CF2_B_HCD35_dead
136	527.046	+4	[ELTLASKR]	hPcf11	655	662	[APKQQQHR]	hPcf11	636	643	K	661	K	638	CF2_B_HCD35_dead
134	506.267	+4	[TEKDVSR]	hPcf11	1371	1377	[APKQQQHR]	hPcf11	636	643	K	1373	K	638	CF2_B_HCD35_dead
134	568.988	+3	[QEKSK]	hPcf11	343	347	[SGEKITKK]	hPcf11	348	355	K	345	K	351	CF2_B_HCD35_dead
133	418.23	+4	[KVTHR]	hPcf11	1378	1382	[TEKDVSR]	hPcf11	1371	1377	K	1378	K	1373	CF2_B_HCD35_dead
132	767.068	+3	[EDRNAKR]	hPcf11	540	546	[STKQDIRDPR]	hPcf11	547	556	K	545	K	549	CF2_B_HCD35_dead
130	496.263	+3	[KELDQLDSKSK]	hPcf11	355	365		Intrapeptidal			K	355	K	363	CF2_B_HCD35_dead
130	605.819	+4	[APKQQQHR]	hPcf11	636	643	[QNRTEKDVSR]	hPcf11	1368	1377	K	638	K	1373	CF2_B_HCD35_dead
130	673.364	+3	[QEKSK]	hPcf11	343	347	[TIPSEKLNSSK]	hPcf11	332	342	K	345	K	337	CF2_B_HCD35_dead
129	509.025	+4	[SGEKITK]	hPcf11	348	354	[KELDQLDSK]	hPcf11	355	363	K	351	K	355	CF2_B_HCD35_dead
129	517.781	+4	[KVTHR]	hPcf11	1378	1382	[QNRTEKDVSR]	hPcf11	1368	1377	K	1378	K	1373	CF2_B_HCD35_dead
128	705.13	+4	[APKQQQHR]	hPcf11	636	643	[SPFNDRFPLKRPR]	hPcf11	705	717	K	638	K	714	CF2_B_HCD35_dead
126	608.289	+3	[KDKDEHMKSSEHR]	hPcf11	429	441		Intrapeptidal			K	429	K	436	CF2_B_HCD35_dead
125	407.73	+4	[AGKIR]	hPcf11	518	522	[EDRNAKR]	hPcf11	540	546	K	520	K	545	CF2_B_HCD35_dead
125	588.643	+3	[SKSGEK]	hPcf11	346	351	[LNSSKQEK]	hPcf11	338	345	K	347	K	342	CF2_B_HCD35_dead
125	607.332	+3	[KVTHR]	hPcf11	1378	1382	[AKSQFFEK]	hPcf11	1404	1411	K	1378	K	1405	CF2_B_HCD35_dead
124	690.039	+3	[KVTHR]	hPcf11	1378	1382	[QNRTEKDVSR]	hPcf11	1368	1377	K	1378	K	1373	CF2_B_HCD35_dead
123	504.261	+4	[TEKDVSR]	hPcf11	1371	1377	[AKSQFFEK]	hPcf11	1404	1411	K	1373	K	1405	CF2_B_HCD35_dead
123	586.513	+5	[APKQQQHR]	hPcf11	636	643	[HRESWSSTKGILSPR]	hPcf11	621	635	K	638	K	629	CF2_B_HCD35_dead
121	457.256	+4	[KVTHRR]	hPcf11	1378	1383	[TEKDVSR]	hPcf11	1371	1377	K	1378	K	1373	CF2_B_HCD35_dead
121	528.551	+4	[AGKIR]	hPcf11	518	522	[STKQDIRDPRR]	hPcf11	547	557	K	520	K	549	CF2_B_HCD35_dead
121	700.345	+3	[LSHTKDLKNQESESMR]	hPcf11	378	393		Intrapeptidal			K	382	K	385	CF2_B_HCD35_dead
120	556.806	+4	[KVTHRR]	hPcf11	1378	1383	[QNRTEKDVSR]	hPcf11	1368	1377	K	1378	K	1373	CF2_B_HCD35_dead
119	554.812	+4	[ELTLASKR]	hPcf11	655	662	[ELLQKTSER]	hPcf11	663	671	K	661	K	667	CF2_B_HCD35_dead
118	334.79	+5	[KVTHR]	hPcf11	1378	1382	[TEKDVSR]	hPcf11	1371	1377	K	1378	K	1373	CF2_B_HCD35_dead
118	552.956	+3	[FMDLK}	hClp1	421	426	[SKDFRR]	hClp1	289	294	K	425	K	290	CF2_B_HCD35_dead
117	575.553	+4	[EDRNAKR]	hPcf11	540	546	[STKQDIRDPR]	hPcf11	547	556	K	545	K	549	CF2_B_HCD35_dead
117	649.69	+3	[TEKDVSR]	hPcf11	1371	1377	[ELTLASKR]	hPcf11	655	662	K	1373	K	661	CF2_B_HCD35_dead
116	732.89	+4	[APKQQQHR]	hPcf11	636	643	[HRESWSSTKGILSPR]	hPcf11	621	635	K	638	K	629	CF2_B_HCD35_dead
116	457.757	+4	[KVTHR]	hPcf11	1378	1382	[APKQQQHR]	hPcf11	636	643	K	1378	K	638	CF2_B_HCD35_dead
116	595.306	+3	[KTAEKKDKDEHMK]	hPcf11	424	436		Intrapeptidal			K	424	K	431	CF2_B_HCD35_dead
116	659.598	+4	[APKQQQHR]	hPcf11	636	643	[ESWSSTKGILSPR]	hPcf11	623	635	K	638	K	629	CF2_B_HCD35_dead
115	653.737	+5	[QAEKEEERGPR]	hClp1	106	116	[HRESWSSTKGILSPR]	hPcf11	621	635	K	109	K	629	CF2_B_HCD35_dead
115	849.478	+4	[ELLQKTSER]	hPcf11	663	671	[LSVDANLQIPKELTLASKR]	hPcf11	644	662	K	667	K	661	CF2_B_HCD35_dead
114	421.838	+5	[ELTLASKR]	hPcf11	655	662	[APKQQQHR]	hPcf11	636	643	K	661	K	638	CF2_B_HCD35_dead
113	346.464	+4	[AGKIR]	hPcf11	518	522	[RSPKR]	hPcf11	501	505	K	520	K	504	CF2_B_HCD35_dead
113	496.782	+4	[KVTHRR]	hPcf11	1378	1383	[APKQQQHR]	hPcf11	636	643	K	1378	K	638	CF2_B_HCD35_dead
113	504.262	+4	[TEKDVSR]	hPcf11	1371	1377	[KFTFDAGAK]	hClp1	54	62	K	1373	K	54	CF2_B_HCD35_dead
113	505.275	+4	[QEKSK]	hPcf11	343	347	[TIPSEKLNSSK]	hPcf11	332	342	K	345	K	337	CF2_B_HCD35_dead
113	557.307	+3	[KVTHR]	hPcf11	1378	1382	[TEKDVSR]	hPcf11	1371	1377	K	1378	K	1373	CF2_B_HCD35_dead
113	629.824	+4	[APKQQQHR]	hPcf11	636	643	[QAEKEEERGPR]	hClp1	106	116	K	638	K	109	CF2_B_HCD35_dead
112	472.47	+5	[SKDFRR]	hClp1	289	294	[TVLLPKSGGVVER]	hClp1	276	288	K	290	K	281	CF2_B_HCD35_dead
112	543.789	+4	[AKSQFFEK]	hPcf11	1404	1411	[APKQQQHR]	hPcf11	636	643	K	1405	K	638	CF2_B_HCD35_dead
110	487.52	+4	[TEKDVSR]	hPcf11	1371	1377	[ELTLASKR]	hPcf11	655	662	K	1373	K	661	CF2_B_HCD35_dead
110	551.312	+4	[SKDFR]	hClp1	289	293	[TVLLPKSGGVVER]	hClp1	276	288	K	290	K	281	CF2_B_HCD35_dead
109	730.56	+5	[YEDSDKPFVDSPASR]	hPcf11	718	732	[HRESWSSTKGILSPR]	hPcf11	621	635	K	723	K	629	CF2_B_HCD35_dead
109	786.781	+3	[SKDFRR]	hClp1	289	294	[TVLLPKSGGVVER]	hClp1	276	288	K	290	K	281	CF2_B_HCD35_dead
108	527.88	+5	[APKQQQHR]	hPcf11	636	643	[ESWSSTKGILSPR]	hPcf11	623	635	K	638	K	629	CF2_B_HCD35_dead
108	423.042	+5	[AGKIR]	hPcf11	518	522	[STKQDIRDPRR]	hPcf11	547	557	K	520	K	549	CF2_B_HCD35_dead
108	489.525	+4	[AGKIR]	hPcf11	518	522	[STKQDIRDPR]	hPcf11	547	556	K	520	K	549	CF2_B_HCD35_dead
108	640.596	+4	[APKQQQHR]	hPcf11	636	643	[STKQDIRDPRR]	hPcf11	547	557	K	638	K	549	CF2_B_HCD35_dead
108	740.392	+4	[APKQQQHR]	hPcf11	636	643	[SLQQVDEHSKPPHLR]	hPcf11	606	620	K	638	K	615	CF2_B_HCD35_dead
107	878.5	+3	[QKQLLELQQKKLELELEQAK]	hPcf11	212	231		Intrapeptidal			K	213	K	221	CF2_B_HCD35_dead
106	474.672	+5	[AGKIR]	hPcf11	518	522	[SPFNDRFPLKRPR]	hPcf11	705	717	K	520	K	714	CF2_B_HCD35_dead
106	590.548	+4	[NKLSHTK]	hPcf11	376	382	[DLKNQESESMR]	hPcf11	383	393	K	377	K	385	CF2_B_HCD35_dead
106	725.854	+4	[APKQQQHR]	hPcf11	636	643	[YEDSDKPFVDSPASR]	hPcf11	718	732	K	638	K	723	CF2_B_HCD35_dead
106	833.985	+4	[QQLLAKQK]	hPcf11	206	213	[QLLELQQKKLELELEQAK]	hPcf11	214	231	K	211	K	222	CF2_B_HCD35_dead
106	931.828	+3	[LLKTGILK]	hPcf11	1276	1283	[YEDSDKPFVDSPASR]	hPcf11	718	732	K	1278	K	723	CF2_B_HCD35_dead
105	664.838	+4	[AGKIR]	hPcf11	518	522	[QSGAKQSHMEEFTPPSR]	hPcf11	523	539	K	520	K	527	CF2_B_HCD35_dead
105	672.014	+3	[TEKDVSR]	hPcf11	1371	1377	[AKSQFFEK]	hPcf11	1404	1411	K	1373	K	1405	CF2_B_HCD35_dead
105	711.752	+3	[QQLLAKQKQLLELQQK]	hPcf11	206	221		Intrapeptidal			K	211	K	213	CF2_B_HCD35_dead
105	742.073	+3	[KVTHRR]	hPcf11	1378	1383	[QNRTEKDVSR]	hPcf11	1368	1377	K	1378	K	1373	CF2_B_HCD35_dead
105	793.117	+3	[QLLELQQKKLELELEQAK]	hPcf11	214	231		Intrapeptidal			K	221	K	222	CF2_B_HCD35_dead
105	810.455	+4	[ELLQKTSER]	hPcf11	663	671	[LSVDANLQIPKELTLASK]	hPcf11	644	661	K	667	K	654	CF2_B_HCD35_dead
105	838.736	+3	[mKKTEEERPQETTNQHSTK]	hPcf11	558	576		Intrapeptidal			K	559	K	560	CF2_B_HCD35_dead
105	967.47	+3	[APKQQQHR]	hPcf11	636	643	[YEDSDKPFVDSPASR]	hPcf11	718	732	K	638	K	723	CF2_B_HCD35_dead
104	548.972	+3	[FMDLK}	hClp1	421	426	[KVTHRR]	hPcf11	1378	1383	K	425	K	1378	CF2_B_HCD35_dead
103	455.751	+4	[KVTHR]	hPcf11	1378	1382	[AKSQFFEK]	hPcf11	1404	1411	K	1378	K	1405	CF2_B_HCD35_dead
103	639.045	+3	[TEKDVSR]	hPcf11	1371	1377	[LLKTGILK]	hPcf11	1276	1283	K	1373	K	1278	CF2_B_HCD35_dead
103	743.629	+4	[QAEKEEERGPR]	hClp1	106	116	[ESWSSTKGILSPR]	hPcf11	623	635	K	109	K	629	CF2_B_HCD35_dead
102	366.006	+5	[KVTHRR]	hPcf11	1378	1383	[TEKDVSR]	hPcf11	1371	1377	K	1378	K	1373	CF2_B_HCD35_dead
102	590.337	+4	[SKDFRR]	hClp1	289	294	[TVLLPKSGGVVER]	hClp1	276	288	K	290	K	281	CF2_B_HCD35_dead
102	1099.54	+3	[MIFEGPNKLSPR]	hPcf11	768	779	[YEDSDKPFVDSPASR]	hPcf11	718	732	K	775	K	723	CF2_B_HCD35_dead
102	1114.53	+3	[DGPTKMIFEGPNK]	hPcf11	763	775	[YEDSDKPFVDSPASR]	hPcf11	718	732	K	767	K	723	CF2_B_HCD35_dead
101	590.47	+6	[SPFNDRFPLKRPR]	hPcf11	705	717	[YEDSDKPFVDSPASR]	hPcf11	718	732	K	714	K	723	CF2_B_HCD35_dead
101	455.751	+4	[KVTHR]	hPcf11	1378	1382	[KFTFDAGAK]	hClp1	54	62	K	1378	K	54	CF2_B_HCD35_dead
101	526.29	+3	[QEKSK]	hPcf11	343	347	[SGEKITK]	hPcf11	348	354	K	345	K	351	CF2_B_HCD35_dead
101	686.328	+4	[TEKDVSR]	hPcf11	1371	1377	[YEDSDKPFVDSPASR]	hPcf11	718	732	K	1373	K	723	CF2_B_HCD35_dead
101	708.357	+5	[SPFNDRFPLKRPR]	hPcf11	705	717	[YEDSDKPFVDSPASR]	hPcf11	718	732	K	714	K	723	CF2_B_HCD35_dead
100	470.425	+6	[APKQQQHR]	hPcf11	636	643	[SPFNDRFPLKRPR]	hPcf11	705	717	K	638	K	714	CF2_B_HCD35_dead
100	660.107	+4	[LYNKITSR]	hClp1	199	206	[ESWSSTKGILSPR]	hPcf11	623	635	K	202	K	629	CF2_B_HCD35_dead
98	612.106	+5	[AGKIR]	hPcf11	518	522	[QSGAKQSHMEEFTPPSREDR]	hPcf11	523	542	K	520	K	527	CF2_B_HCD35_dead
98	764.88	+4	[AGKIR]	hPcf11	518	522	[QSGAKQSHMEEFTPPSREDR]	hPcf11	523	542	K	520	K	527	CF2_B_HCD35_dead
97	529.288	+4	[AKSQFFEKVHEEVVLK]	hPcf11	1404	1419		Intrapeptidal			K	1405	K	1411	CF2_B_HCD35_dead
97	672.361	+3	[SGEKITKKELDQLDSK]	hPcf11	348	363		Intrapeptidal			K	351	K	354	CF2_B_HCD35_dead
97	699.123	+4	[LLKTGILK]	hPcf11	1276	1283	[YEDSDKPFVDSPASR]	hPcf11	718	732	K	1278	K	723	CF2_B_HCD35_dead
95	532.072	+5	[AGKIR]	hPcf11	518	522	[QSGAKQSHMEEFTPPSR]	hPcf11	523	539	K	520	K	527	CF2_B_HCD35_dead
95	627.817	+4	[AKSQFFEK]	hPcf11	1404	1411	[QAEKEEERGPR]	hClp1	106	116	K	1405	K	109	CF2_B_HCD35_dead
95	828.439	+3	[NKIINGIVQKQDTITEESEK]	hPcf11	447	466		Intrapeptidal			K	448	K	456	CF2_B_HCD35_dead
94	433.751	+4	[AGKIR]	hPcf11	518	522	[APKQQQHR]	hPcf11	636	643	K	520	K	638	CF2_B_HCD35_dead
94	592.921	+5	[LYNKITSR]	hClp1	199	206	[SLQQVDEHSKPPHLR]	hPcf11	606	620	K	202	K	615	CF2_B_HCD35_dead
93	387.725	+4	[AGKIR]	hPcf11	518	522	[SKDFRR]	hClp1	289	294	K	520	K	290	CF2_B_HCD35_dead
93	1274.19	+4	[QQLLAKQK]	hPcf11	206	213	[SPEEPSTPGTVVSSPSISTPPIVPDIQKNLTQEQLIR]	hPcf11	169	205	K	211	K	196	CF2_B_HCD35_dead
92	415.45	+5	[LLKTGILK]	hPcf11	1276	1283	[APKQQQHR]	hPcf11	636	643	K	1278	K	638	CF2_B_HCD35_dead
92	839.66	+4	[ESWSSTKGILSPR]	hPcf11	623	635	[YEDSDKPFVDSPASR]	hPcf11	718	732	K	629	K	723	CF2_B_HCD35_dead
92	366.407	+5	[KVTHR]	hPcf11	1378	1382	[APKQQQHR]	hPcf11	636	643	K	1378	K	638	CF2_B_HCD35_dead
92	580.885	+5	[APKQQQHR]	hPcf11	636	643	[YEDSDKPFVDSPASR]	hPcf11	718	732	K	638	K	723	CF2_B_HCD35_dead
92	885.437	+3	[RMKKTEEERPQETTNQHSTK]	hPcf11	557	576		Intrapeptidal			K	559	K	560	CF2_B_HCD35_dead
92	1001.77	+4	[YEDSDKPFVDSPASR]	hPcf11	718	732	[LSVDANLQIPKELTLASKR]	hPcf11	644	662	K	723	K	661	CF2_B_HCD35_dead
91	626.323	+5	[ESWSSTKGILSPR]	hPcf11	623	635	[RQAEKEEERGPR]	hClp1	105	116	K	629	K	109	CF2_B_HCD35_dead
91	732.37	+3	[KHLQDKTDGKDDDVKEK]	hPcf11	406	422		Intrapeptidal			K	406	K	411	CF2_B_HCD35_dead
89	609.824	+4	[LKKHLQDKTDGKDDDVKEK]	hPcf11	404	422		Intrapeptidal			K	406	K	411	CF2_B_HCD35_dead
86	510.256	+6	[AGKIR]	hPcf11	518	522	[QSGAKQSHMEEFTPPSREDR]	hPcf11	523	542	K	520	K	527	CF2_B_HCD35_dead
85	581.112	+5	[LYNELKR]	hClp1	262	268	[SLQQVDEHSKPPHLR]	hPcf11	606	620	K	267	K	615	CF2_B_HCD35_dead
85	700.363	+4	[RKTAEK]	hPcf11	423	428	[HLQDKTDGKDDDVKEK]	hPcf11	407	422	K	424	K	420	CF2_B_HCD35_dead
85	978.703	+4	[TEEERPQETTNQHSTKSGTEPKENVENWQSSK]	hPcf11	561	592		Intrapeptidal			K	576	K	582	CF2_B_HCD35_dead
84	595.104	+5	[QAEKEEERGPR]	hClp1	106	116	[ESWSSTKGILSPR]	hPcf11	623	635	K	109	K	629	CF2_B_HCD35_dead
81	679.784	+5	[ELLQKTSER]	hPcf11	663	671	[LSVDANLQIPKELTLASKR]	hPcf11	644	662	K	667	K	654	CF2_B_HCD35_dead
80	714.37	+4	[TSKTIPSEK]	hPcf11	329	337	[KEFLMNTLNQSDTK]	hPcf11	315	328	K	331	K	315	CF2_B_HCD35_dead
71	604.84	+4	[KVTHR]	hPcf11	1378	1382	[VHEEVVLKTQEAAK]	hPcf11	1412	1425	K	1378	K	1419	CF2_B_HCD35_dead
68	653.352	+4	[TEKDVSR]	hPcf11	1371	1377	[VHEEVVLKTQEAAK]	hPcf11	1412	1425	K	1373	K	1419	CF2_B_HCD35_dead
61	736.56	+5	[YEDSDKPFVDSPASR]	hPcf11	718	732	[SLQQVDEHSKPPHLR]	hPcf11	606	620	K	723	K	615	CF2_B_HCD35_dead
55	546.83	+4	[LLKTGILK]	hPcf11	1276	1283	[ELLQKTSER]	hPcf11	663	671	K	1278	K	667	CF2_B_HCD35_dead
147	407.73	+4	[AGKIR]	hPcf11	518	522	[EDRNAKR]	hPcf11	540	546	K	520	K	545	CF2_B_stHCD
144	414.969	+4	[FMDLK}	hClp1	421	426	[SKDFRR]	hClp1	289	294	K	425	K	290	CF2_B_stHCD
113	527.045	+4	[ELTLASKR]	hPcf11	655	662	[APKQQQHR]	hPcf11	636	643	K	661	K	638	CF2_B_stHCD
104	544.95	+6	[QAEKEEERGPR]	hClp1	106	116	[HRESWSSTKGILSPR]	hPcf11	621	635	K	109	K	629	CF2_B_stHCD
104	759.773	+5	[YEDSDKPFVDSPASR]	hPcf11	718	732	[DGPTKMIFEGPNKLSPR]	hPcf11	763	779	K	723	K	767	CF2_B_stHCD
100	725.856	+4	[APKQQQHR]	hPcf11	636	643	[YEDSDKPFVDSPASR]	hPcf11	718	732	K	638	K	723	CF2_B_stHCD
99	421.837	+5	[ELTLASKR]	hPcf11	655	662	[APKQQQHR]	hPcf11	636	643	K	661	K	638	CF2_B_stHCD
99	504.06	+5	[APKQQQHR]	hPcf11	636	643	[QAEKEEERGPR]	hClp1	106	116	K	638	K	109	CF2_B_stHCD
96	457.757	+4	[KVTHR]	hPcf11	1378	1382	[APKQQQHR]	hPcf11	636	643	K	1378	K	638	CF2_B_stHCD
94	648.109	+5	[QAEKEEERGPR]	hClp1	106	116	[YEDSDKPFVDSPASR]	hPcf11	718	732	K	109	K	723	CF2_B_stHCD
93	653.736	+5	[QAEKEEERGPR]	hClp1	106	116	[HRESWSSTKGILSPR]	hPcf11	621	635	K	109	K	629	CF2_B_stHCD
89	470.425	+6	[APKQQQHR]	hPcf11	636	643	[SPFNDRFPLKRPR]	hPcf11	705	717	K	638	K	714	CF2_B_stHCD
146	407.73	+4	[AGKIR]	hPcf11	518	522	[EDRNAKR]	hPcf11	540	546	K	520	K	545	CF2_B_stHCD_dead
145	363.23	+3	[KSLFKLR]	hPcf11	113	119		Intrapeptidal			K	113	K	117	CF2_B_stHCD_dead
145	557.3	+3	[KVTHR]	hPcf11	1378	1382	[TEKDVSR]	hPcf11	1371	1377	K	1378	K	1373	CF2_B_stHCD_dead
136	414.969	+4	[FMDLK}	hClp1	421	426	[SKDFRR]	hClp1	289	294	K	425	K	290	CF2_B_stHCD_dead
125	695.027	+3	[DGPTKMIFEGPNKLSPR]	hPcf11	763	779		Intrapeptidal			K	767	K	775	CF2_B_stHCD_dead
121	448.908	+3	[LNSSKQEKSK]	hPcf11	338	347		Intrapeptidal			K	342	K	345	CF2_B_stHCD_dead
117	672.361	+3	[SGEKITKKELDQLDSK]	hPcf11	348	363		Intrapeptidal			K	351	K	355	CF2_B_stHCD_dead
112	334.785	+5	[KVTHR]	hPcf11	1378	1382	[TEKDVSR]	hPcf11	1371	1377	K	1378	K	1373	CF2_B_stHCD_dead
112	586.513	+5	[APKQQQHR]	hPcf11	636	643	[HRESWSSTKGILSPR]	hPcf11	621	635	K	638	K	629	CF2_B_stHCD_dead
110	527.045	+4	[ELTLASKR]	hPcf11	655	662	[APKQQQHR]	hPcf11	636	643	K	661	K	638	CF2_B_stHCD_dead
108	366.006	+5	[KVTHRR]	hPcf11	1378	1383	[TEKDVSR]	hPcf11	1371	1377	K	1378	K	1373	CF2_B_stHCD_dead
108	423.042	+5	[AGKIR]	hPcf11	518	522	[STKQDIRDPRR]	hPcf11	547	557	K	520	K	549	CF2_B_stHCD_dead
108	457.256	+4	[KVTHRR]	hPcf11	1378	1383	[TEKDVSR]	hPcf11	1371	1377	K	1378	K	1373	CF2_B_stHCD_dead
106	614.578	+4	[EDRNAKR]	hPcf11	540	546	[STKQDIRDPRR]	hPcf11	547	557	K	545	K	549	CF2_B_stHCD_dead
105	609.338	+3	[KVTHRR]	hPcf11	1378	1383	[TEKDVSR]	hPcf11	1371	1377	K	1378	K	1373	CF2_B_stHCD_dead
104	472.471	+5	[SKDFRR]	hClp1	289	294	[TVLLPKSGGVVER]	hClp1	276	288	K	290	K	281	CF2_B_stHCD_dead
104	590.337	+4	[SKDFRR]	hClp1	289	294	[TVLLPKSGGVVER]	hClp1	276	288	K	290	K	281	CF2_B_stHCD_dead
103	544.95	+6	[QAEKEEERGPR]	hClp1	106	116	[HRESWSSTKGILSPR]	hPcf11	621	635	K	109	K	629	CF2_B_stHCD_dead
103	759.773	+5	[YEDSDKPFVDSPASR]	hPcf11	718	732	[DGPTKMIFEGPNKLSPR]	hPcf11	763	779	K	723	K	767	CF2_B_stHCD_dead
100	488.928	+6	[APKQQQHR]	hPcf11	636	643	[HRESWSSTKGILSPR]	hPcf11	621	635	K	638	K	629	CF2_B_stHCD_dead
100	612.106	+5	[AGKIR]	hPcf11	518	522	[QSGAKQSHMEEFTPPSREDR]	hPcf11	523	542	K	520	K	527	CF2_B_stHCD_dead
96	828.439	+3	[NKIINGIVQKQDTITEESEK]	hPcf11	447	466		Intrapeptidal			K	448	K	456	CF2_B_stHCD_dead
95	532.072	+5	[AGKIR]	hPcf11	518	522	[QSGAKQSHMEEFTPPSR]	hPcf11	523	539	K	520	K	527	CF2_B_stHCD_dead
94	629.823	+4	[APKQQQHR]	hPcf11	636	643	[QAEKEEERGPR]	hClp1	106	116	K	638	K	109	CF2_B_stHCD_dead
94	648.109	+5	[QAEKEEERGPR]	hClp1	106	116	[YEDSDKPFVDSPASR]	hPcf11	718	732	K	109	K	723	CF2_B_stHCD_dead
93	457.757	+4	[KVTHR]	hPcf11	1378	1382	[APKQQQHR]	hPcf11	636	643	K	1378	K	638	CF2_B_stHCD_dead
91	522.431	+6	[WKSGWEENK]	hPcf11	597	605	[SLQQVDEHSKPPHLR]	hPcf11	606	620	K	598	K	615	CF2_B_stHCD_dead
91	580.885	+5	[APKQQQHR]	hPcf11	636	643	[YEDSDKPFVDSPASR]	hPcf11	718	732	K	638	K	723	CF2_B_stHCD_dead
91	653.736	+5	[QAEKEEERGPR]	hClp1	106	116	[HRESWSSTKGILSPR]	hPcf11	621	635	K	109	K	629	CF2_B_stHCD_dead
87	551.313	+4	[SKDFR]	hClp1	289	293	[TVLLPKSGGVVER]	hClp1	276	288	K	290	K	281	CF2_B_stHCD_dead
164	784.789	+3	[QQLLAKQK]	hPcf11	206	213	[KLELELEQAK]	hPcf11	222	231	K	211	K	222	CF2_C_HCD30
162	607.332	+3	[KVTHR]	hPcf11	1378	1382	[AKSQFFEK]	hPcf11	1404	1411	K	1378	K	1405	CF2_C_HCD30
153	457.757	+4	[KVTHR]	hPcf11	1378	1382	[APKQQQHR]	hPcf11	636	643	K	1378	K	638	CF2_C_HCD30
150	702.392	+3	[ELTLASKR]	hPcf11	655	662	[APKQQQHR]	hPcf11	636	643	K	661	K	638	CF2_C_HCD30
148	527.045	+4	[ELTLASKR]	hPcf11	655	662	[APKQQQHR]	hPcf11	636	643	K	661	K	638	CF2_C_HCD30
145	724.716	+3	[AKSQFFEK]	hPcf11	1404	1411	[APKQQQHR]	hPcf11	636	643	K	1405	K	638	CF2_C_HCD30
144	414.969	+4	[FMDLK}	hClp1	421	426	[SKDFRR]	hClp1	289	294	K	425	K	290	CF2_C_HCD30
144	672.013	+3	[TEKDVSR]	hPcf11	1371	1377	[AKSQFFEK]	hPcf11	1404	1411	K	1373	K	1405	CF2_C_HCD30
139	506.267	+4	[TEKDVSR]	hPcf11	1371	1377	[APKQQQHR]	hPcf11	636	643	K	1373	K	638	CF2_C_HCD30
139	610.007	+3	[KVTHR]	hPcf11	1378	1382	[APKQQQHR]	hPcf11	636	643	K	1378	K	638	CF2_C_HCD30
137	421.838	+5	[ELTLASKR]	hPcf11	655	662	[APKQQQHR]	hPcf11	636	643	K	661	K	638	CF2_C_HCD30
135	543.788	+4	[AKSQFFEK]	hPcf11	1404	1411	[APKQQQHR]	hPcf11	636	643	K	1405	K	638	CF2_C_HCD30
134	588.844	+4	[QQLLAKQK]	hPcf11	206	213	[KLELELEQAK]	hPcf11	222	231	K	211	K	222	CF2_C_HCD30
133	500.92	+3	[SKDFR]	hClp1	289	293	[FMDLK}	hClp1	421	426	K	290	K	425	CF2_C_HCD30
130	418.967	+4	[FmDLK}	hClp1	421	426	[SKDFRR]	hClp1	289	294	K	425	K	290	CF2_C_HCD30
130	764.413	+3	[APKQQQHR]	hPcf11	636	643	[ELLQKTSER]	hPcf11	663	671	K	638	T	668	CF2_C_HCD30
127	455.751	+4	[KVTHR]	hPcf11	1378	1382	[AKSQFFEK]	hPcf11	1404	1411	K	1378	K	1405	CF2_C_HCD30
123	504.261	+4	[TEKDVSR]	hPcf11	1371	1377	[AKSQFFEK]	hPcf11	1404	1411	K	1373	K	1405	CF2_C_HCD30
123	604.839	+4	[KVTHR]	hPcf11	1378	1382	[VHEEVVLKTQEAAK]	hPcf11	1412	1425	K	1378	T	1420	CF2_C_HCD30
123	649.69	+3	[TEKDVSR]	hPcf11	1371	1377	[ELTLASKR]	hPcf11	655	662	K	1373	K	661	CF2_C_HCD30
122	854.129	+3	[ELTLASKR]	hPcf11	655	662	[ESWSSTKGILSPR]	hPcf11	623	635	K	661	S	633	CF2_C_HCD30
121	487.519	+4	[TEKDVSR]	hPcf11	1371	1377	[ELTLASKR]	hPcf11	655	662	K	1373	K	661	CF2_C_HCD30
119	784.394	+3	[APKQQQHR]	hPcf11	636	643	[WKSGWEENK]	hPcf11	597	605	K	638	K	598	CF2_C_HCD30
118	571.561	+4	[KVTHR]	hPcf11	1378	1382	[ESWSSTKGILSPR]	hPcf11	623	635	K	1378	S	633	CF2_C_HCD30
116	573.561	+4	[APKQQQHR]	hPcf11	636	643	[ELLQKTSER]	hPcf11	663	671	K	638	T	668	CF2_C_HCD30
116	640.849	+4	[ELTLASKR]	hPcf11	655	662	[ESWSSTKGILSPR]	hPcf11	623	635	K	661	S	633	CF2_C_HCD30
114	489.525	+4	[AGKIR]	hPcf11	518	522	[STKQDIRDPR]	hPcf11	547	556	K	520	K	549	CF2_C_HCD30
112	942.47	+3	[ELTLASKR]	hPcf11	655	662	[YEDSDKPFVDSPASR]	hPcf11	718	732	K	661	K	723	CF2_C_HCD30
111	546.83	+4	[LLKTGILK]	hPcf11	1276	1283	[ELLQKTSER]	hPcf11	663	671	K	1278	T	668	CF2_C_HCD30
111	914.768	+3	[TEKDVSR]	hPcf11	1371	1377	[YEDSDKPFVDSPASR]	hPcf11	718	732	K	1373	K	723	CF2_C_HCD30
111	1114.53	+3	[DGPTKMIFEGPNK]	hPcf11	763	775	[YEDSDKPFVDSPASR]	hPcf11	718	732	T	766	K	723	CF2_C_HCD30
110	967.47	+3	[APKQQQHR]	hPcf11	636	643	[YEDSDKPFVDSPASR]	hPcf11	718	732	K	638	S	721	CF2_C_HCD30
108	806.115	+3	[KVTHR]	hPcf11	1378	1382	[VHEEVVLKTQEAAK]	hPcf11	1412	1425	K	1378	T	1420	CF2_C_HCD30
107	740.39	+4	[APKQQQHR]	hPcf11	636	643	[SLQQVDEHSKPPHLR]	hPcf11	606	620	K	638	K	615	CF2_C_HCD30
107	931.828	+3	[LLKTGILK]	hPcf11	1276	1283	[YEDSDKPFVDSPASR]	hPcf11	718	732	K	1278	K	723	CF2_C_HCD30
106	639.045	+3	[TEKDVSR]	hPcf11	1371	1377	[LLKTGILK]	hPcf11	1276	1283	K	1373	K	1278	CF2_C_HCD30
106	653.736	+5	[QAEKEEERGPR]	hClp1	106	116	[HRESWSSTKGILSPR]	hPcf11	621	635	K	109	K	629	CF2_C_HCD30
106	686.328	+4	[TEKDVSR]	hPcf11	1371	1377	[YEDSDKPFVDSPASR]	hPcf11	718	732	K	1373	K	723	CF2_C_HCD30
106	699.123	+4	[LLKTGILK]	hPcf11	1276	1283	[YEDSDKPFVDSPASR]	hPcf11	718	732	K	1278	K	723	CF2_C_HCD30
105	552.956	+3	[FMDLK}	hClp1	421	426	[SKDFRR]	hClp1	289	294	K	425	K	290	CF2_C_HCD30
105	725.855	+4	[APKQQQHR]	hPcf11	636	643	[YEDSDKPFVDSPASR]	hPcf11	718	732	K	638	K	723	CF2_C_HCD30
103	545.031	+4	[TAEKK]	hPcf11	425	429	[TDGKDDDVKEKR]	hPcf11	412	423	K	428	K	422	CF2_C_HCD30
99	405.215	+5	[TEKDVSR]	hPcf11	1371	1377	[APKQQQHR]	hPcf11	636	643	K	1373	K	638	CF2_C_HCD30
99	666.329	+5	[STKQDIRDPR]	hPcf11	547	556	[QSGAKQSHMEEFTPPSR]	hPcf11	523	539	K	549	K	527	CF2_C_HCD30
91	580.885	+5	[APKQQQHR]	hPcf11	636	643	[YEDSDKPFVDSPASR]	hPcf11	718	732	K	638	S	721	CF2_C_HCD30
89	639.349	+4	[KVTHR]	hPcf11	1378	1382	[SQFFEKVHEEVVLK]	hPcf11	1406	1419	K	1378	K	1411	CF2_C_HCD30
88	588.547	+4	[APKQQQHR]	hPcf11	636	643	[WKSGWEENK]	hPcf11	597	605	K	638	K	598	CF2_C_HCD30
85	481.458	+5	[APKQQQHR]	hPcf11	636	643	[STKQDIRDPR]	hPcf11	547	556	K	638	K	549	CF2_C_HCD30
85	840.145	+4	[DGPTKmIFEGPNK]	hPcf11	763	775	[YEDSDKPFVDSPASR]	hPcf11	718	732	K	767	K	723	CF2_C_HCD30
84	736.563	+5	[YEDSDKPFVDSPASR]	hPcf11	718	732	[SLQQVDEHSKPPHLR]	hPcf11	606	620	K	723	K	615	CF2_C_HCD30
74	824.421	+4	[QAEKEEERGPR]	hClp1	106	116	[SLQQVDEHSKPPHLR]	hPcf11	606	620	K	109	K	615	CF2_C_HCD30
166	784.789	+3	[QQLLAKQK]	hPcf11	206	213	[KLELELEQAK]	hPcf11	222	231	K	211	K	222	CF2_C_HCD30_dead
162	557.305	+3	[KVTHR]	hPcf11	1378	1382	[TEKDVSR]	hPcf11	1371	1377	K	1378	K	1373	CF2_C_HCD30_dead
162	607.332	+3	[KVTHR]	hPcf11	1378	1382	[AKSQFFEK]	hPcf11	1404	1411	K	1378	K	1405	CF2_C_HCD30_dead
158	526.289	+3	[QEKSK]	hPcf11	343	347	[SGEKITK]	hPcf11	348	354	K	345	K	351	CF2_C_HCD30_dead
152	702.392	+3	[ELTLASKR]	hPcf11	655	662	[APKQQQHR]	hPcf11	636	643	K	661	K	638	CF2_C_HCD30_dead
151	457.757	+4	[KVTHR]	hPcf11	1378	1382	[APKQQQHR]	hPcf11	636	643	K	1378	K	638	CF2_C_HCD30_dead
148	527.045	+4	[ELTLASKR]	hPcf11	655	662	[APKQQQHR]	hPcf11	636	643	K	661	K	638	CF2_C_HCD30_dead
143	517.78	+4	[KVTHR]	hPcf11	1378	1382	[QNRTEKDVSR]	hPcf11	1368	1377	K	1378	K	1373	CF2_C_HCD30_dead
142	724.716	+3	[AKSQFFEK]	hPcf11	1404	1411	[APKQQQHR]	hPcf11	636	643	K	1405	K	638	CF2_C_HCD30_dead
141	363.225	+3	[KSLFKLR]	hPcf11	113	119		Intrapeptidal			K	113	K	117	CF2_C_HCD30_dead
139	418.23	+4	[KVTHR]	hPcf11	1378	1382	[TEKDVSR]	hPcf11	1371	1377	K	1378	K	1373	CF2_C_HCD30_dead
139	545.031	+4	[KTAEK]	hPcf11	424	428	[TDGKDDDVKEKR]	hPcf11	412	423	K	424	K	422	CF2_C_HCD30_dead
138	588.844	+4	[QQLLAKQK]	hPcf11	206	213	[KLELELEQAK]	hPcf11	222	231	K	211	K	222	CF2_C_HCD30_dead
138	672.013	+3	[TEKDVSR]	hPcf11	1371	1377	[AKSQFFEK]	hPcf11	1404	1411	K	1373	K	1405	CF2_C_HCD30_dead
137	672.01	+3	[TEKDVSR]	hPcf11	1371	1377	[KFTFDAGAK]	hClp1	54	62	K	1373	K	54	CF2_C_HCD30_dead
135	506.267	+4	[TEKDVSR]	hPcf11	1371	1377	[APKQQQHR]	hPcf11	636	643	K	1373	K	638	CF2_C_HCD30_dead
134	421.838	+5	[ELTLASKR]	hPcf11	655	662	[APKQQQHR]	hPcf11	636	643	K	661	K	638	CF2_C_HCD30_dead
134	879.129	+3	[APKQQQHR]	hPcf11	636	643	[ESWSSTKGILSPR]	hPcf11	623	635	K	638	K	629	CF2_C_HCD30_dead
133	500.92	+3	[SKDFR]	hClp1	289	293	[FMDLK}	hClp1	421	426	K	290	K	425	CF2_C_HCD30_dead
133	496.263	+3	[KELDQLDSKSK]	hPcf11	355	365		Intrapeptidal			K	355	K	363	CF2_C_HCD30_dead
132	610.007	+3	[KVTHR]	hPcf11	1378	1382	[APKQQQHR]	hPcf11	636	643	K	1378	K	638	CF2_C_HCD30_dead
130	606.641	+3	[KTAEK]	hPcf11	424	428	[KDKDEHmK]	hPcf11	429	436	K	424	K	431	CF2_C_HCD30_dead
129	588.643	+3	[SKSGEK]	hPcf11	346	351	[LNSSKQEK]	hPcf11	338	345	K	347	K	342	CF2_C_HCD30_dead
127	764.413	+3	[APKQQQHR]	hPcf11	636	643	[ELLQKTSER]	hPcf11	663	671	K	638	K	667	CF2_C_HCD30_dead
126	952.16	+3	[TSKTIPSEK]	hPcf11	329	337	[KEFLMNTLNQSDTK]	hPcf11	315	328	K	331	K	315	CF2_C_HCD30_dead
126	586.513	+5	[APKQQQHR]	hPcf11	636	643	[HRESWSSTKGILSPR]	hPcf11	621	635	K	638	K	629	CF2_C_HCD30_dead
125	504.262	+4	[TEKDVSR]	hPcf11	1371	1377	[KFTFDAGAK]	hClp1	54	62	K	1373	K	54	CF2_C_HCD30_dead
124	334.786	+5	[KVTHR]	hPcf11	1378	1382	[TEKDVSR]	hPcf11	1371	1377	K	1378	K	1373	CF2_C_HCD30_dead
124	455.751	+4	[KVTHR]	hPcf11	1378	1382	[AKSQFFEK]	hPcf11	1404	1411	K	1378	K	1405	CF2_C_HCD30_dead
123	504.261	+4	[TEKDVSR]	hPcf11	1371	1377	[AKSQFFEK]	hPcf11	1404	1411	K	1373	K	1405	CF2_C_HCD30_dead
123	568.988	+3	[QEKSK]	hPcf11	343	347	[SGEKITKK]	hPcf11	348	355	K	345	K	351	CF2_C_HCD30_dead
121	649.69	+3	[TEKDVSR]	hPcf11	1371	1377	[ELTLASKR]	hPcf11	655	662	K	1373	K	661	CF2_C_HCD30_dead
120	604.839	+4	[KVTHR]	hPcf11	1378	1382	[VHEEVVLKTQEAAK]	hPcf11	1412	1425	K	1378	K	1419	CF2_C_HCD30_dead
119	457.255	+4	[KVTHRR]	hPcf11	1378	1383	[TEKDVSR]	hPcf11	1371	1377	K	1378	K	1373	CF2_C_HCD30_dead
119	487.519	+4	[TEKDVSR]	hPcf11	1371	1377	[ELTLASKR]	hPcf11	655	662	K	1373	K	661	CF2_C_HCD30_dead
118	732.889	+4	[APKQQQHR]	hPcf11	636	643	[HRESWSSTKGILSPR]	hPcf11	621	635	K	638	K	629	CF2_C_HCD30_dead
118	854.129	+3	[ELTLASKR]	hPcf11	655	662	[ESWSSTKGILSPR]	hPcf11	623	635	K	661	K	629	CF2_C_HCD30_dead
116	793.117	+3	[QLLELQQKKLELELEQAK]	hPcf11	214	231		Intrapeptidal			K	221	K	222	CF2_C_HCD30_dead
114	551.312	+4	[SKDFR]	hClp1	289	293	[TVLLPKSGGVVER]	hClp1	276	288	K	290	K	281	CF2_C_HCD30_dead
113	472.471	+5	[SKDFRR]	hClp1	289	294	[TVLLPKSGGVVER]	hClp1	276	288	K	290	K	281	CF2_C_HCD30_dead
112	640.849	+4	[ELTLASKR]	hPcf11	655	662	[ESWSSTKGILSPR]	hPcf11	623	635	K	661	K	629	CF2_C_HCD30_dead
111	366.006	+5	[KVTHRR]	hPcf11	1378	1383	[TEKDVSR]	hPcf11	1371	1377	K	1378	K	1373	CF2_C_HCD30_dead
111	414.425	+5	[KVTHR]	hPcf11	1378	1382	[QNRTEKDVSR]	hPcf11	1368	1377	K	1378	K	1373	CF2_C_HCD30_dead
111	707.047	+3	[LNSSKQEK]	hPcf11	338	345	[TSKTIPSEK]	hPcf11	329	337	K	342	K	331	CF2_C_HCD30_dead
110	546.83	+4	[LLKTGILK]	hPcf11	1276	1283	[ELLQKTSER]	hPcf11	663	671	K	1278	K	667	CF2_C_HCD30_dead
109	700.34	+3	[LSHTKDLKNQESESMR]	hPcf11	378	393		Intrapeptidal			K	382	K	385	CF2_C_HCD30_dead
109	489.525	+4	[AGKIR]	hPcf11	518	522	[STKQDIRDPR]	hPcf11	547	556	K	520	K	549	CF2_C_HCD30_dead
109	509.025	+4	[SGEKITK]	hPcf11	348	354	[KELDQLDSK]	hPcf11	355	363	K	351	K	355	CF2_C_HCD30_dead
109	914.768	+3	[TEKDVSR]	hPcf11	1371	1377	[YEDSDKPFVDSPASR]	hPcf11	718	732	K	1373	K	723	CF2_C_HCD30_dead
109	1114.53	+3	[DGPTKMIFEGPNK]	hPcf11	763	775	[YEDSDKPFVDSPASR]	hPcf11	718	732	K	767	K	723	CF2_C_HCD30_dead
108	568.276	+4	[TAEKK]	hPcf11	425	429	[DKDEHMKSSEHR]	hPcf11	430	441	K	428	K	436	CF2_C_HCD30_dead
105	734.747	+3	[SKDFR]	hClp1	289	293	[TVLLPKSGGVVER]	hClp1	276	288	K	290	K	281	CF2_C_HCD30_dead
104	686.328	+4	[TEKDVSR]	hPcf11	1371	1377	[YEDSDKPFVDSPASR]	hPcf11	718	732	K	1373	K	723	CF2_C_HCD30_dead
103	676.93	+5	[ISQHSHGKDQSHR]	hPcf11	302	314	[KEFLMNTLNQSDTK]	hPcf11	315	328	K	309	K	315	CF2_C_HCD30_dead
103	527.88	+5	[APKQQQHR]	hPcf11	636	643	[ESWSSTKGILSPR]	hPcf11	623	635	K	638	K	629	CF2_C_HCD30_dead
103	711.752	+3	[QQLLAKQKQLLELQQK]	hPcf11	206	221		Intrapeptidal			K	211	K	213	CF2_C_HCD30_dead
103	845.916	+4	[ISQHSHGKDQSHR]	hPcf11	302	314	[KEFLMNTLNQSDTK]	hPcf11	315	328	K	309	K	315	CF2_C_HCD30_dead
98	488.928	+6	[APKQQQHR]	hPcf11	636	643	[HRESWSSTKGILSPR]	hPcf11	621	635	K	638	K	629	CF2_C_HCD30_dead
97	405.215	+5	[TEKDVSR]	hPcf11	1371	1377	[APKQQQHR]	hPcf11	636	643	K	1373	K	638	CF2_C_HCD30_dead
96	666.329	+5	[STKQDIRDPR]	hPcf11	547	556	[QSGAKQSHMEEFTPPSR]	hPcf11	523	539	K	549	K	527	CF2_C_HCD30_dead
93	828.439	+3	[NKIINGIVQKQDTITEESEK]	hPcf11	447	466		Intrapeptidal			K	448	K	456	CF2_C_HCD30_dead
90	580.885	+5	[APKQQQHR]	hPcf11	636	643	[YEDSDKPFVDSPASR]	hPcf11	718	732	K	638	K	723	CF2_C_HCD30_dead
83	797.43	+3	[STWDEIFPLKKLYALDVR]	hPcf11	120	137		Intrapeptidal			K	129	K	130	CF2_C_HCD30_dead
82	710.345	+4	[KTEEERPQETTNQHSTKSGTEPK]	hPcf11	560	582		Intrapeptidal			K	560	K	576	CF2_C_HCD30_dead
76	485.245	+4	[KHLQDKTDGKDDDVK]	hPcf11	406	420		Intrapeptidal			K	406	K	411	CF2_C_HCD30_dead
157	784.788	+3	[QQLLAKQK]	hPcf11	206	213	[KLELELEQAK]	hPcf11	222	231	K	211	K	222	CF2_C_HCD35
147	702.392	+3	[ELTLASKR]	hPcf11	655	662	[APKQQQHR]	hPcf11	636	643	K	661	K	638	CF2_C_HCD35
146	411.981	+4	[FMDLK}	hClp1	421	426	[KVTHRR]	hPcf11	1378	1383	K	425	K	1378	CF2_C_HCD35
143	543.303	+3	[AGKIR]	hPcf11	518	522	[EDRNAKR]	hPcf11	540	546	K	520	K	545	CF2_C_HCD35
141	527.046	+4	[ELTLASKR]	hPcf11	655	662	[APKQQQHR]	hPcf11	636	643	K	661	K	638	CF2_C_HCD35
139	414.97	+4	[FMDLK}	hClp1	421	426	[SKDFRR]	hClp1	289	294	K	425	K	290	CF2_C_HCD35
139	610.01	+3	[KVTHR]	hPcf11	1378	1382	[APKQQQHR]	hPcf11	636	643	K	1378	K	638	CF2_C_HCD35
139	705.135	+4	[APKQQQHR]	hPcf11	636	643	[SPFNDRFPLKRPR]	hPcf11	705	717	K	638	K	714	CF2_C_HCD35
138	607.333	+3	[KVTHR]	hPcf11	1378	1382	[AKSQFFEK]	hPcf11	1404	1411	K	1378	K	1405	CF2_C_HCD35
136	500.922	+3	[SKDFR]	hClp1	289	293	[FMDLK}	hClp1	421	426	K	290	K	425	CF2_C_HCD35
129	724.717	+3	[AKSQFFEK]	hPcf11	1404	1411	[APKQQQHR]	hPcf11	636	643	K	1405	K	638	CF2_C_HCD35
125	407.73	+4	[AGKIR]	hPcf11	518	522	[EDRNAKR]	hPcf11	540	546	K	520	K	545	CF2_C_HCD35
124	506.266	+4	[TEKDVSR]	hPcf11	1371	1377	[APKQQQHR]	hPcf11	636	643	K	1373	K	638	CF2_C_HCD35
124	967.47	+3	[APKQQQHR]	hPcf11	636	643	[YEDSDKPFVDSPASR]	hPcf11	718	732	K	638	S	721	CF2_C_HCD35
122	588.844	+4	[QQLLAKQK]	hPcf11	206	213	[KLELELEQAK]	hPcf11	222	231	K	211	K	222	CF2_C_HCD35
122	653.736	+5	[QAEKEEERGPR]	hClp1	106	116	[HRESWSSTKGILSPR]	hPcf11	621	635	K	109	K	629	CF2_C_HCD35
119	455.751	+4	[KVTHR]	hPcf11	1378	1382	[AKSQFFEK]	hPcf11	1404	1411	K	1378	K	1405	CF2_C_HCD35
118	639.044	+3	[TEKDVSR]	hPcf11	1371	1377	[LLKTGILK]	hPcf11	1276	1283	K	1373	K	1278	CF2_C_HCD35
116	552.956	+3	[FMDLK}	hClp1	421	426	[SKDFRR]	hClp1	289	294	K	425	K	290	CF2_C_HCD35
111	725.854	+4	[APKQQQHR]	hPcf11	636	643	[YEDSDKPFVDSPASR]	hPcf11	718	732	K	638	K	723	CF2_C_HCD35
111	942.47	+3	[ELTLASKR]	hPcf11	655	662	[YEDSDKPFVDSPASR]	hPcf11	718	732	K	661	K	723	CF2_C_HCD35
110	564.309	+5	[APKQQQHR]	hPcf11	636	643	[SPFNDRFPLKRPR]	hPcf11	705	717	K	638	K	714	CF2_C_HCD35
109	421.838	+5	[ELTLASKR]	hPcf11	655	662	[APKQQQHR]	hPcf11	636	643	K	661	K	638	CF2_C_HCD35
108	674.69	+3	[TEKDVSR]	hPcf11	1371	1377	[APKQQQHR]	hPcf11	636	643	K	1373	K	638	CF2_C_HCD35
106	504.261	+4	[TEKDVSR]	hPcf11	1371	1377	[AKSQFFEK]	hPcf11	1404	1411	K	1373	K	1405	CF2_C_HCD35
105	548.973	+3	[FMDLK}	hClp1	421	426	[KVTHRR]	hPcf11	1378	1383	K	425	K	1378	CF2_C_HCD35
105	740.393	+4	[APKQQQHR]	hPcf11	636	643	[SLQQVDEHSKPPHLR]	hPcf11	606	620	K	638	K	615	CF2_C_HCD35
104	640.849	+4	[ELTLASKR]	hPcf11	655	662	[ESWSSTKGILSPR]	hPcf11	623	635	K	661	S	633	CF2_C_HCD35
103	931.828	+3	[LLKTGILK]	hPcf11	1276	1283	[YEDSDKPFVDSPASR]	hPcf11	718	732	K	1278	K	723	CF2_C_HCD35
102	699.123	+4	[LLKTGILK]	hPcf11	1276	1283	[YEDSDKPFVDSPASR]	hPcf11	718	732	K	1278	K	723	CF2_C_HCD35
100	397.627	+5	[KVTHRR]	hPcf11	1378	1383	[APKQQQHR]	hPcf11	636	643	K	1378	K	638	CF2_C_HCD35
100	469.027	+4	[RSPKR]	hPcf11	501	505	[SPIIHSPKR]	hPcf11	489	497	K	504	K	496	CF2_C_HCD35
97	1114.53	+3	[DGPTKMIFEGPNK]	hPcf11	763	775	[YEDSDKPFVDSPASR]	hPcf11	718	732	K	767	K	723	CF2_C_HCD35
96	672.013	+3	[TEKDVSR]	hPcf11	1371	1377	[AKSQFFEK]	hPcf11	1404	1411	S	1376	K	1405	CF2_C_HCD35
95	635.998	+3	[SKSGEK]	hPcf11	346	351	[KELDQLDSK]	hPcf11	355	363	S	348	K	355	CF2_C_HCD35
95	686.328	+4	[TEKDVSR]	hPcf11	1371	1377	[YEDSDKPFVDSPASR]	hPcf11	718	732	K	1373	K	723	CF2_C_HCD35
93	580.885	+5	[APKQQQHR]	hPcf11	636	643	[YEDSDKPFVDSPASR]	hPcf11	718	732	K	638	Y	718	CF2_C_HCD35
85	595.104	+5	[QAEKEEERGPR]	hClp1	106	116	[ESWSSTKGILSPR]	hPcf11	623	635	K	109	K	629	CF2_C_HCD35
79	683.558	+5	[ESWSSTKGILSPR]	hPcf11	623	635	[SLQQVDEHSKPPHLR]	hPcf11	606	620	K	629	K	615	CF2_C_HCD35
79	840.145	+4	[DGPTKmIFEGPNK]	hPcf11	763	775	[YEDSDKPFVDSPASR]	hPcf11	718	732	K	767	K	723	CF2_C_HCD35
77	543.789	+4	[AKSQFFEK]	hPcf11	1404	1411	[APKQQQHR]	hPcf11	636	643	K	1405	K	638	CF2_C_HCD35
76	573.562	+4	[APKQQQHR]	hPcf11	636	643	[ELLQKTSER]	hPcf11	663	671	K	638	S	669	CF2_C_HCD35
163	557.304	+3	[KVTHR]	hPcf11	1378	1382	[TEKDVSR]	hPcf11	1371	1377	K	1378	K	1373	CF2_C_HCD35_dead
159	784.788	+3	[QQLLAKQK]	hPcf11	206	213	[KLELELEQAK]	hPcf11	222	231	K	211	K	222	CF2_C_HCD35_dead
146	739.414	+3	[ELTLASKR]	hPcf11	655	662	[ELLQKTSER]	hPcf11	663	671	K	661	K	667	CF2_C_HCD35_dead
146	879.129	+3	[APKQQQHR]	hPcf11	636	643	[ESWSSTKGILSPR]	hPcf11	623	635	K	638	K	629	CF2_C_HCD35_dead
144	543.303	+3	[AGKIR]	hPcf11	518	522	[EDRNAKR]	hPcf11	540	546	K	520	K	545	CF2_C_HCD35_dead
143	702.392	+3	[ELTLASKR]	hPcf11	655	662	[APKQQQHR]	hPcf11	636	643	K	661	K	638	CF2_C_HCD35_dead
142	527.046	+4	[ELTLASKR]	hPcf11	655	662	[APKQQQHR]	hPcf11	636	643	K	661	K	638	CF2_C_HCD35_dead
141	411.981	+4	[FMDLK}	hClp1	421	426	[KVTHRR]	hPcf11	1378	1383	K	425	K	1378	CF2_C_HCD35_dead
140	588.642	+3	[SKSGEK]	hPcf11	346	351	[LNSSKQEK]	hPcf11	338	345	K	347	K	342	CF2_C_HCD35_dead
139	363.23	+3	[KSLFKLR]	hPcf11	113	119		Intrapeptidal			K	113	K	117	CF2_C_HCD35_dead
138	609.34	+3	[KVTHRR]	hPcf11	1378	1383	[TEKDVSR]	hPcf11	1371	1377	K	1378	K	1373	CF2_C_HCD35_dead
134	767.068	+3	[EDRNAKR]	hPcf11	540	546	[STKQDIRDPR]	hPcf11	547	556	K	545	K	549	CF2_C_HCD35_dead
134	786.78	+3	[SKDFRR]	hClp1	289	294	[TVLLPKSGGVVER]	hClp1	276	288	K	290	K	281	CF2_C_HCD35_dead
133	414.97	+4	[FMDLK}	hClp1	421	426	[SKDFRR]	hClp1	289	294	K	425	K	290	CF2_C_HCD35_dead
133	496.263	+3	[KELDQLDSKSK]	hPcf11	355	365		Intrapeptidal			K	355	K	363	CF2_C_HCD35_dead
133	500.922	+3	[SKDFR]	hClp1	289	293	[FMDLK}	hClp1	421	426	K	290	K	425	CF2_C_HCD35_dead
133	607.333	+3	[KVTHR]	hPcf11	1378	1382	[AKSQFFEK]	hPcf11	1404	1411	K	1378	K	1405	CF2_C_HCD35_dead
133	705.135	+4	[APKQQQHR]	hPcf11	636	643	[SPFNDRFPLKRPR]	hPcf11	705	717	K	638	K	714	CF2_C_HCD35_dead
132	610.01	+3	[KVTHR]	hPcf11	1378	1382	[APKQQQHR]	hPcf11	636	643	K	1378	K	638	CF2_C_HCD35_dead
131	517.78	+4	[KVTHR]	hPcf11	1378	1382	[QNRTEKDVSR]	hPcf11	1368	1377	K	1378	K	1373	CF2_C_HCD35_dead
131	732.888	+4	[APKQQQHR]	hPcf11	636	643	[HRESWSSTKGILSPR]	hPcf11	621	635	K	638	K	629	CF2_C_HCD35_dead
129	588.844	+4	[QQLLAKQK]	hPcf11	206	213	[KLELELEQAK]	hPcf11	222	231	K	211	K	222	CF2_C_HCD35_dead
125	418.23	+4	[KVTHR]	hPcf11	1378	1382	[TEKDVSR]	hPcf11	1371	1377	K	1378	K	1373	CF2_C_HCD35_dead
124	434.586	+3	[SKSGEKITKK]	hPcf11	346	355		Intrapeptidal			K	347	K	351	CF2_C_HCD35_dead
124	724.717	+3	[AKSQFFEK]	hPcf11	1404	1411	[APKQQQHR]	hPcf11	636	643	K	1405	K	638	CF2_C_HCD35_dead
123	407.73	+4	[AGKIR]	hPcf11	518	522	[EDRNAKR]	hPcf11	540	546	K	520	K	545	CF2_C_HCD35_dead
123	457.255	+4	[KVTHRR]	hPcf11	1378	1383	[TEKDVSR]	hPcf11	1371	1377	K	1378	K	1373	CF2_C_HCD35_dead
123	833.403	+3	[MKKTEEERPQETTNQHSTK]	hPcf11	558	576		Intrapeptidal			K	559	K	560	CF2_C_HCD35_dead
121	472.471	+5	[SKDFRR]	hClp1	289	294	[TVLLPKSGGVVER]	hClp1	276	288	K	290	K	281	CF2_C_HCD35_dead
121	506.266	+4	[TEKDVSR]	hPcf11	1371	1377	[APKQQQHR]	hPcf11	636	643	K	1373	K	638	CF2_C_HCD35_dead
121	653.736	+5	[QAEKEEERGPR]	hClp1	106	116	[HRESWSSTKGILSPR]	hPcf11	621	635	K	109	K	629	CF2_C_HCD35_dead
121	672.013	+3	[TEKDVSR]	hPcf11	1371	1377	[KFTFDAGAK]	hClp1	54	62	K	1373	K	54	CF2_C_HCD35_dead
119	595.305	+3	[KTAEKKDKDEHMK]	hPcf11	424	436		Intrapeptidal			K	424	K	428	CF2_C_HCD35_dead
117	700.345	+3	[LSHTKDLKNQESESMR]	hPcf11	378	393		Intrapeptidal			K	382	K	385	CF2_C_HCD35_dead
116	509.025	+4	[SGEKITK]	hPcf11	348	354	[KELDQLDSK]	hPcf11	355	363	K	351	K	355	CF2_C_HCD35_dead
116	586.512	+5	[APKQQQHR]	hPcf11	636	643	[HRESWSSTKGILSPR]	hPcf11	621	635	K	638	K	629	CF2_C_HCD35_dead
115	418.97	+4	[FmDLK}	hClp1	421	426	[SKDFRR]	hClp1	289	294	K	425	K	290	CF2_C_HCD35_dead
114	455.751	+4	[KVTHR]	hPcf11	1378	1382	[AKSQFFEK]	hPcf11	1404	1411	K	1378	K	1405	CF2_C_HCD35_dead
111	838.735	+3	[mKKTEEERPQETTNQHSTK]	hPcf11	558	576		Intrapeptidal			K	559	K	560	CF2_C_HCD35_dead
110	575.552	+4	[EDRNAKR]	hPcf11	540	546	[STKQDIRDPR]	hPcf11	547	556	K	545	K	549	CF2_C_HCD35_dead
110	942.47	+3	[ELTLASKR]	hPcf11	655	662	[YEDSDKPFVDSPASR]	hPcf11	718	732	K	661	K	723	CF2_C_HCD35_dead
109	725.854	+4	[APKQQQHR]	hPcf11	636	643	[YEDSDKPFVDSPASR]	hPcf11	718	732	K	638	K	723	CF2_C_HCD35_dead
109	878.503	+3	[QKQLLELQQKKLELELEQAK]	hPcf11	212	231		Intrapeptidal			K	213	K	221	CF2_C_HCD35_dead
108	659.599	+4	[APKQQQHR]	hPcf11	636	643	[ESWSSTKGILSPR]	hPcf11	623	635	K	638	K	629	CF2_C_HCD35_dead
106	551.312	+4	[SKDFR]	hClp1	289	293	[TVLLPKSGGVVER]	hClp1	276	288	K	290	K	281	CF2_C_HCD35_dead
105	421.838	+5	[ELTLASKR]	hPcf11	655	662	[APKQQQHR]	hPcf11	636	643	K	661	K	638	CF2_C_HCD35_dead
105	554.812	+4	[ELTLASKR]	hPcf11	655	662	[ELLQKTSER]	hPcf11	663	671	K	661	K	667	CF2_C_HCD35_dead
105	793.117	+3	[QLLELQQKKLELELEQAK]	hPcf11	214	231		Intrapeptidal			K	221	K	222	CF2_C_HCD35_dead
104	366.005	+5	[KVTHRR]	hPcf11	1378	1383	[TEKDVSR]	hPcf11	1371	1377	K	1378	K	1373	CF2_C_HCD35_dead
104	414.425	+5	[KVTHR]	hPcf11	1378	1382	[QNRTEKDVSR]	hPcf11	1368	1377	K	1378	K	1373	CF2_C_HCD35_dead
104	672.361	+3	[SGEKITKKELDQLDSK]	hPcf11	348	363		Intrapeptidal			K	351	K	355	CF2_C_HCD35_dead
103	527.88	+5	[APKQQQHR]	hPcf11	636	643	[ESWSSTKGILSPR]	hPcf11	623	635	K	638	K	629	CF2_C_HCD35_dead
103	640.849	+4	[ELTLASKR]	hPcf11	655	662	[ESWSSTKGILSPR]	hPcf11	623	635	K	661	K	629	CF2_C_HCD35_dead
103	711.751	+3	[QQLLAKQKQLLELQQK]	hPcf11	206	221		Intrapeptidal			K	211	K	213	CF2_C_HCD35_dead
103	730.56	+5	[YEDSDKPFVDSPASR]	hPcf11	718	732	[HRESWSSTKGILSPR]	hPcf11	621	635	K	723	K	629	CF2_C_HCD35_dead
103	740.393	+4	[APKQQQHR]	hPcf11	636	643	[SLQQVDEHSKPPHLR]	hPcf11	606	620	K	638	K	615	CF2_C_HCD35_dead
102	781.058	+3	[NKLSHTKDLKNQESESMR]	hPcf11	376	393		Intrapeptidal			K	377	K	382	CF2_C_HCD35_dead
100	649.689	+3	[TEKDVSR]	hPcf11	1371	1377	[ELTLASKR]	hPcf11	655	662	K	1373	K	661	CF2_C_HCD35_dead
99	548.973	+3	[FMDLK}	hClp1	421	426	[KVTHRR]	hPcf11	1378	1383	K	425	K	1378	CF2_C_HCD35_dead
99	699.123	+4	[LLKTGILK]	hPcf11	1276	1283	[YEDSDKPFVDSPASR]	hPcf11	718	732	K	1278	K	723	CF2_C_HCD35_dead
99	828.439	+3	[NKIINGIVQKQDTITEESEK]	hPcf11	447	466		Intrapeptidal			K	448	K	456	CF2_C_HCD35_dead
99	845.916	+4	[ISQHSHGKDQSHR]	hPcf11	302	314	[KEFLMNTLNQSDTK]	hPcf11	315	328	K	309	K	315	CF2_C_HCD35_dead
97	812.764	+3	[LKKHLQDKTDGKDDDVKEK]	hPcf11	404	422		Intrapeptidal			K	405	K	420	CF2_C_HCD35_dead
96	470.425	+6	[APKQQQHR]	hPcf11	636	643	[SPFNDRFPLKRPR]	hPcf11	705	717	K	638	K	714	CF2_C_HCD35_dead
96	612.106	+5	[AGKIR]	hPcf11	518	522	[QSGAKQSHMEEFTPPSREDR]	hPcf11	523	542	K	520	K	527	CF2_C_HCD35_dead
96	734.747	+3	[SKDFR]	hClp1	289	293	[TVLLPKSGGVVER]	hClp1	276	288	K	290	K	281	CF2_C_HCD35_dead
95	469.027	+4	[RSPKR]	hPcf11	501	505	[SPIIHSPKR]	hPcf11	489	497	K	504	K	496	CF2_C_HCD35_dead
95	590.337	+4	[SKDFRR]	hClp1	289	294	[TVLLPKSGGVVER]	hClp1	276	288	K	290	K	281	CF2_C_HCD35_dead
93	572.644	+3	[TSKTIPSEKLNSSK]	hPcf11	329	342		Intrapeptidal			K	331	K	337	CF2_C_HCD35_dead
93	590.548	+4	[NKLSHTK]	hPcf11	376	382	[DLKNQESESMR]	hPcf11	383	393	K	377	K	385	CF2_C_HCD35_dead
93	686.328	+4	[TEKDVSR]	hPcf11	1371	1377	[YEDSDKPFVDSPASR]	hPcf11	718	732	K	1373	K	723	CF2_C_HCD35_dead
85	648.109	+5	[QAEKEEERGPR]	hClp1	106	116	[YEDSDKPFVDSPASR]	hPcf11	718	732	K	109	K	723	CF2_C_HCD35_dead
84	659.13	+4	[QKQLLELQQKKLELELEQAK]	hPcf11	212	231		Intrapeptidal			K	213	K	221	CF2_C_HCD35_dead
83	582.111	+5	[APKQQQHR]	hPcf11	636	643	[SQFFEKVHEEVVLK]	hPcf11	1406	1419	K	638	K	1411	CF2_C_HCD35_dead
83	692.877	+4	[APKQQQHR]	hPcf11	636	643	[VHEEVVLKTQEAAK]	hPcf11	1412	1425	K	638	K	1419	CF2_C_HCD35_dead
80	601.305	+3	[SAKRWKSGWEENK]	hPcf11	593	605		Intrapeptidal			K	595	K	598	CF2_C_HCD35_dead
78	586.522	+5	[ELLQKTSER]	hPcf11	663	671	[SPFNDRFPLKRPR]	hPcf11	705	717	K	667	K	714	CF2_C_HCD35_dead
78	666.329	+5	[STKQDIRDPR]	hPcf11	547	556	[QSGAKQSHMEEFTPPSR]	hPcf11	523	539	K	549	K	527	CF2_C_HCD35_dead
66	726.358	+4	[LYNKITSR]	hClp1	199	206	[YEDSDKPFVDSPASR]	hPcf11	718	732	K	202	K	723	CF2_C_HCD35_dead
65	607.333	+3	[KVTHR]	hPcf11	1378	1382	[KFTFDAGAK]	hClp1	54	62	K	1378	K	54	CF2_C_HCD35_dead
60	605.817	+4	[APKQQQHR]	hPcf11	636	643	[QNRTEKDVSR]	hPcf11	1368	1377	K	638	K	1373	CF2_C_HCD35_dead
154	421.837	+5	[ELTLASKR]	hPcf11	655	662	[APKQQQHR]	hPcf11	636	643	K	661	K	638	CF2_C_stHCD
148	411.98	+4	[FMDLK}	hClp1	421	426	[KVTHRR]	hPcf11	1378	1383	K	425	K	1378	CF2_C_stHCD
148	506.267	+4	[TEKDVSR]	hPcf11	1371	1377	[APKQQQHR]	hPcf11	636	643	K	1373	K	638	CF2_C_stHCD
145	414.968	+4	[FMDLK}	hClp1	421	426	[SKDFRR]	hClp1	289	294	K	425	K	290	CF2_C_stHCD
145	702.391	+3	[ELTLASKR]	hPcf11	655	662	[APKQQQHR]	hPcf11	636	643	K	661	K	638	CF2_C_stHCD
144	407.73	+4	[AGKIR]	hPcf11	518	522	[EDRNAKR]	hPcf11	540	546	K	520	K	545	CF2_C_stHCD
136	527.045	+4	[ELTLASKR]	hPcf11	655	662	[APKQQQHR]	hPcf11	636	643	K	661	K	638	CF2_C_stHCD
134	500.922	+3	[SKDFR]	hClp1	289	293	[FMDLK}	hClp1	421	426	K	290	K	425	CF2_C_stHCD
127	543.304	+3	[AGKIR]	hPcf11	518	522	[EDRNAKR]	hPcf11	540	546	K	520	K	545	CF2_C_stHCD
126	784.788	+3	[QQLLAKQK]	hPcf11	206	213	[KLELELEQAK]	hPcf11	222	231	K	211	K	222	CF2_C_stHCD
123	455.75	+4	[KVTHR]	hPcf11	1378	1382	[AKSQFFEK]	hPcf11	1404	1411	K	1378	K	1405	CF2_C_stHCD
120	588.843	+4	[QQLLAKQK]	hPcf11	206	213	[KLELELEQAK]	hPcf11	222	231	K	211	K	222	CF2_C_stHCD
114	552.956	+3	[FMDLK}	hClp1	421	426	[SKDFRR]	hClp1	289	294	K	425	K	290	CF2_C_stHCD
112	366.407	+5	[KVTHR]	hPcf11	1378	1382	[APKQQQHR]	hPcf11	636	643	K	1378	K	638	CF2_C_stHCD
112	753.621	+4	[ELLQKTSER]	hPcf11	663	671	[YEDSDKPFVDSPASR]	hPcf11	718	732	S	669	K	723	CF2_C_stHCD
111	607.332	+3	[KVTHR]	hPcf11	1378	1382	[AKSQFFEK]	hPcf11	1404	1411	K	1378	K	1405	CF2_C_stHCD
107	423.042	+5	[AGKIR]	hPcf11	518	522	[STKQDIRDPRR]	hPcf11	547	557	K	520	S	547	CF2_C_stHCD
107	724.716	+3	[AKSQFFEK]	hPcf11	1404	1411	[APKQQQHR]	hPcf11	636	643	K	1405	K	638	CF2_C_stHCD
105	457.757	+4	[KVTHR]	hPcf11	1378	1382	[APKQQQHR]	hPcf11	636	643	K	1378	K	638	CF2_C_stHCD
104	573.561	+4	[APKQQQHR]	hPcf11	636	643	[ELLQKTSER]	hPcf11	663	671	K	638	T	668	CF2_C_stHCD
102	967.47	+3	[APKQQQHR]	hPcf11	636	643	[YEDSDKPFVDSPASR]	hPcf11	718	732	K	638	S	721	CF2_C_stHCD
101	942.47	+3	[ELTLASKR]	hPcf11	655	662	[YEDSDKPFVDSPASR]	hPcf11	718	732	K	661	K	723	CF2_C_stHCD
100	931.827	+3	[LLKTGILK]	hPcf11	1276	1283	[YEDSDKPFVDSPASR]	hPcf11	718	732	K	1278	K	723	CF2_C_stHCD
99	326.385	+5	[AGKIR]	hPcf11	518	522	[EDRNAKR]	hPcf11	540	546	K	520	K	545	CF2_C_stHCD
99	580.885	+5	[APKQQQHR]	hPcf11	636	643	[YEDSDKPFVDSPASR]	hPcf11	718	732	K	638	S	721	CF2_C_stHCD
97	725.85	+4	[APKQQQHR]	hPcf11	636	643	[YEDSDKPFVDSPASR]	hPcf11	718	732	K	638	K	723	CF2_C_stHCD
96	603.813	+4	[KFTFDAGAK]	hClp1	54	62	[QNRTEKDVSR]	hPcf11	1368	1377	K	54	K	1373	CF2_C_stHCD
96	686.327	+4	[TEKDVSR]	hPcf11	1371	1377	[YEDSDKPFVDSPASR]	hPcf11	718	732	K	1373	K	723	CF2_C_stHCD
95	489.525	+4	[AGKIR]	hPcf11	518	522	[STKQDIRDPR]	hPcf11	547	556	K	520	K	549	CF2_C_stHCD
93	470.425	+6	[APKQQQHR]	hPcf11	636	643	[SPFNDRFPLKRPR]	hPcf11	705	717	K	638	K	714	CF2_C_stHCD
165	557.304	+3	[KVTHR]	hPcf11	1378	1382	[TEKDVSR]	hPcf11	1371	1377	K	1378	K	1373	CF2_C_stHCD_dead
152	421.837	+5	[ELTLASKR]	hPcf11	655	662	[APKQQQHR]	hPcf11	636	643	K	661	K	638	CF2_C_stHCD_dead
146	702.391	+3	[ELTLASKR]	hPcf11	655	662	[APKQQQHR]	hPcf11	636	643	K	661	K	638	CF2_C_stHCD_dead
145	506.267	+4	[TEKDVSR]	hPcf11	1371	1377	[APKQQQHR]	hPcf11	636	643	K	1373	K	638	CF2_C_stHCD_dead
143	411.98	+4	[FMDLK}	hClp1	421	426	[KVTHRR]	hPcf11	1378	1383	K	425	K	1378	CF2_C_stHCD_dead
143	588.643	+3	[SKSGEK]	hPcf11	346	351	[LNSSKQEK]	hPcf11	338	345	K	347	K	342	CF2_C_stHCD_dead
142	407.73	+4	[AGKIR]	hPcf11	518	522	[EDRNAKR]	hPcf11	540	546	K	520	K	545	CF2_C_stHCD_dead
142	418.23	+4	[KVTHR]	hPcf11	1378	1382	[TEKDVSR]	hPcf11	1371	1377	K	1378	K	1373	CF2_C_stHCD_dead
142	517.78	+4	[KVTHR]	hPcf11	1378	1382	[QNRTEKDVSR]	hPcf11	1368	1377	K	1378	K	1373	CF2_C_stHCD_dead
140	414.968	+4	[FMDLK}	hClp1	421	426	[SKDFRR]	hClp1	289	294	K	425	K	290	CF2_C_stHCD_dead
138	363.225	+3	[KSLFKLR]	hPcf11	113	119		Intrapeptidal			K	113	K	117	CF2_C_stHCD_dead
132	678.36	+3	[SGEKITK]	hPcf11	348	354	[KELDQLDSK]	hPcf11	355	363	K	351	K	355	CF2_C_stHCD_dead
132	500.922	+3	[SKDFR]	hClp1	289	293	[FMDLK}	hClp1	421	426	K	290	K	425	CF2_C_stHCD_dead
132	527.045	+4	[ELTLASKR]	hPcf11	655	662	[APKQQQHR]	hPcf11	636	643	K	661	K	638	CF2_C_stHCD_dead
130	334.785	+5	[KVTHR]	hPcf11	1378	1382	[TEKDVSR]	hPcf11	1371	1377	K	1378	K	1373	CF2_C_stHCD_dead
126	414.425	+5	[KVTHR]	hPcf11	1378	1382	[QNRTEKDVSR]	hPcf11	1368	1377	K	1378	K	1373	CF2_C_stHCD_dead
126	695.028	+3	[DGPTKMIFEGPNKLSPR]	hPcf11	763	779		Intrapeptidal			K	767	K	775	CF2_C_stHCD_dead
125	784.788	+3	[QQLLAKQK]	hPcf11	206	213	[KLELELEQAK]	hPcf11	222	231	K	211	K	222	CF2_C_stHCD_dead
123	588.843	+4	[QQLLAKQK]	hPcf11	206	213	[KLELELEQAK]	hPcf11	222	231	K	211	K	222	CF2_C_stHCD_dead
123	700.345	+3	[LSHTKDLKNQESESMR]	hPcf11	378	393		Intrapeptidal			K	382	K	385	CF2_C_stHCD_dead
122	457.255	+4	[KVTHRR]	hPcf11	1378	1383	[TEKDVSR]	hPcf11	1371	1377	K	1378	K	1373	CF2_C_stHCD_dead
121	366.006	+5	[KVTHRR]	hPcf11	1378	1383	[TEKDVSR]	hPcf11	1371	1377	K	1378	K	1373	CF2_C_stHCD_dead
121	504.262	+4	[TEKDVSR]	hPcf11	1371	1377	[KFTFDAGAK]	hClp1	54	62	K	1373	K	54	CF2_C_stHCD_dead
118	455.75	+4	[KVTHR]	hPcf11	1378	1382	[AKSQFFEK]	hPcf11	1404	1411	K	1378	K	1405	CF2_C_stHCD_dead
116	672.36	+3	[SGEKITKKELDQLDSK]	hPcf11	348	363		Intrapeptidal			K	351	K	355	CF2_C_stHCD_dead
116	879.129	+3	[APKQQQHR]	hPcf11	636	643	[ESWSSTKGILSPR]	hPcf11	623	635	K	638	K	629	CF2_C_stHCD_dead
114	700.359	+3	[DGPTKmIFEGPNKLSPR]	hPcf11	763	779		Intrapeptidal			K	767	K	775	CF2_C_stHCD_dead
113	472.471	+5	[SKDFRR]	hClp1	289	294	[TVLLPKSGGVVER]	hClp1	276	288	K	290	K	281	CF2_C_stHCD_dead
113	601.305	+3	[SAKRWKSGWEENK]	hPcf11	593	605		Intrapeptidal			K	595	K	598	CF2_C_stHCD_dead
112	767.067	+3	[EDRNAKR]	hPcf11	540	546	[STKQDIRDPR]	hPcf11	547	556	K	545	K	549	CF2_C_stHCD_dead
111	586.512	+5	[APKQQQHR]	hPcf11	636	643	[HRESWSSTKGILSPR]	hPcf11	621	635	K	638	K	629	CF2_C_stHCD_dead
111	695.027	+3	[DGPTKMIFEGPNKLSPR]	hPcf11	763	779		Intrapeptidal			K	767	K	775	CF2_C_stHCD_dead
111	753.621	+4	[ELLQKTSER]	hPcf11	663	671	[YEDSDKPFVDSPASR]	hPcf11	718	732	K	667	K	723	CF2_C_stHCD_dead
107	366.407	+5	[KVTHR]	hPcf11	1378	1382	[APKQQQHR]	hPcf11	636	643	K	1378	K	638	CF2_C_stHCD_dead
107	672.014	+3	[TEKDVSR]	hPcf11	1371	1377	[KFTFDAGAK]	hClp1	54	62	K	1373	K	54	CF2_C_stHCD_dead
106	554.812	+4	[ELTLASKR]	hPcf11	655	662	[ELLQKTSER]	hPcf11	663	671	K	661	K	667	CF2_C_stHCD_dead
105	664.838	+4	[AGKIR]	hPcf11	518	522	[QSGAKQSHMEEFTPPSR]	hPcf11	523	539	K	520	K	527	CF2_C_stHCD_dead
105	786.781	+3	[SKDFRR]	hClp1	289	294	[TVLLPKSGGVVER]	hClp1	276	288	K	290	K	281	CF2_C_stHCD_dead
104	529.288	+4	[AKSQFFEKVHEEVVLK]	hPcf11	1404	1419		Intrapeptidal			K	1405	K	1411	CF2_C_stHCD_dead
104	573.561	+4	[APKQQQHR]	hPcf11	636	643	[ELLQKTSER]	hPcf11	663	671	K	638	K	667	CF2_C_stHCD_dead
104	724.716	+3	[AKSQFFEK]	hPcf11	1404	1411	[APKQQQHR]	hPcf11	636	643	K	1405	K	638	CF2_C_stHCD_dead
103	551.312	+4	[SKDFR]	hClp1	289	293	[TVLLPKSGGVVER]	hClp1	276	288	K	290	K	281	CF2_C_stHCD_dead
103	967.47	+3	[APKQQQHR]	hPcf11	636	643	[YEDSDKPFVDSPASR]	hPcf11	718	732	K	638	K	723	CF2_C_stHCD_dead
98	659.599	+4	[APKQQQHR]	hPcf11	636	643	[ESWSSTKGILSPR]	hPcf11	623	635	K	638	K	629	CF2_C_stHCD_dead
97	580.885	+5	[APKQQQHR]	hPcf11	636	643	[YEDSDKPFVDSPASR]	hPcf11	718	732	K	638	K	723	CF2_C_stHCD_dead
94	686.327	+4	[TEKDVSR]	hPcf11	1371	1377	[YEDSDKPFVDSPASR]	hPcf11	718	732	K	1373	K	723	CF2_C_stHCD_dead
94	828.439	+3	[NKIINGIVQKQDTITEESEK]	hPcf11	447	466		Intrapeptidal			K	448	K	456	CF2_C_stHCD_dead
93	734.747	+3	[SKDFR]	hClp1	289	293	[TVLLPKSGGVVER]	hClp1	276	288	K	290	K	281	CF2_C_stHCD_dead
91	470.425	+6	[APKQQQHR]	hPcf11	636	643	[SPFNDRFPLKRPR]	hPcf11	705	717	K	638	K	714	CF2_C_stHCD_dead
91	527.881	+5	[APKQQQHR]	hPcf11	636	643	[ESWSSTKGILSPR]	hPcf11	623	635	K	638	K	629	CF2_C_stHCD_dead
91	532.071	+5	[AGKIR]	hPcf11	518	522	[QSGAKQSHMEEFTPPSR]	hPcf11	523	539	K	520	K	527	CF2_C_stHCD_dead
89	510.255	+6	[AGKIR]	hPcf11	518	522	[QSGAKQSHMEEFTPPSREDR]	hPcf11	523	542	K	520	K	527	CF2_C_stHCD_dead
85	410.054	+6	[EDRNAKR]	hPcf11	540	546	[STKQDIRDPRR]	hPcf11	547	557	K	545	K	549	CF2_C_stHCD_dead
85	600.894	+5	[EDRNAKR]	hPcf11	540	546	[QSGAKQSHMEEFTPPSR]	hPcf11	523	539	K	545	K	527	CF2_C_stHCD_dead
